# Supplementary material for: Notch-Dependent Pituitary SOX2+ Stem Cells Exhibit a Timed Functional Extinction in Regulation of the Postnatal Gland
Source: PubMed Central journal article supplement — Stem Cell Reports. 2015 Dec 8;5(6):1196–209. doi: 10.1016/j.stemcr.2015.11.001 (PMC4682291; doi:10.1016/j.stemcr.2015.11.001), 2015-12-08
Supplement: mmc2.pdf [file mmc2.pdf]

# Notch-Dependent Pituitary SOX2<sup>+</sup> Stem Cells Exhibit a Timed Functional Extinction in Regulation of the Postnatal Gland

Xiaoyan Zhu,<sup>1,2,\*</sup> Jessica Tollkuhn,<sup>1,3</sup> Havilah Taylor,<sup>1</sup> and Michael G. Rosenfeld<sup>1,\*</sup>

<sup>1</sup>Howard Hughes Medical Institute, Department and School of Medicine, University of California at San Diego, La Jolla, CA 92093, USA

<sup>2</sup>Present address: The Salk Institute for Biological Studies, La Jolla, CA 92037, USA

<sup>3</sup>Present address: One Bungtown Road, Cold Spring Harbor, NY 11724, USA

\*Correspondence: [xzhu@salk.edu](mailto:xzhu@salk.edu) (X.Z.), [mrosenfeld@ucsd.edu](mailto:mrosenfeld@ucsd.edu) (M.G.R.)

<http://dx.doi.org/10.1016/j.stemcr.2015.11.001>

This is an open access article under the CC BY-NC-ND license (<http://creativecommons.org/licenses/by-nc-nd/4.0/>).

## SUMMARY

Although SOX2<sup>+</sup> stem cells are present in the postnatal pituitary gland, how they are regulated molecularly and whether they are required for pituitary functions remain unresolved questions. Using a conditional knockout animal model, here we demonstrate that ablation of the canonical Notch signaling in the embryonic pituitary gland leads to progressive depletion of the SOX2<sup>+</sup> stem cells and hypoplastic gland. Furthermore, we show that the SOX2<sup>+</sup> stem cells initially play a significant role in contributing to postnatal pituitary gland expansion by self-renewal and differentiating into distinct lineages in the immediate postnatal period. However, we found that within several weeks postpartum, the SOX2<sup>+</sup> stem cells switch to an essentially dormant state and are no longer required for homeostasis/tissue adaptation. Our results present a dynamic tissue homeostatic model in which stem cells provide an initial contribution to the growth of the neonatal pituitary gland, whereas the mature gland can be maintained in a stem cell-independent fashion.

## INTRODUCTION

The pituitary gland plays a fundamental role in regulating a wide variety of physiological functions, including growth, lactation, stress response, reproduction, and metabolism. These complex functions are regulated by six distinct hormone-producing cell types distinguished by the different hormones they synthesize and secrete, including corticotropes secreting adrenocorticotrophic hormone (ACTH), thyrotropes secreting thyroid-stimulating hormone (TSH), somatotropes secreting growth hormone (GH), lactotropes secreting prolactin (PRL), gonadotropes secreting luteinizing hormone (LH) and follicle-stimulating hormone (FSH), and melanotropes secreting melanocyte-stimulating hormone (MSH). During pituitary organogenesis, these lineages emerge in a stereotypical spatio-temporal pattern from a common ectodermal primordium, Rathke's pouch (RP). Extensive studies in model systems have demonstrated that multiple signaling pathways, transcription factors, and cofactors define the genetic hierarchy that controls embryonic pituitary development (Davis et al., 2011; Kelberman et al., 2009; Zhu et al., 2007).

We and others have shown previously that the evolutionarily conserved Notch signaling pathway plays an important role in early embryonic pituitary development (Kita et al., 2007; Raetzman et al., 2004, 2007; Zhu et al., 2006). Delta/Notch signaling, mediated by the critical transcription factor RBP-J, acts to prevent progenitor cells in the RP from premature differentiation through *Hes1*, one of the downstream target genes of the Notch pathway. It also controls the competence of progenitor cells by maintaining

expression of the *Prop1* gene, which encodes a pituitary-specific, paired-like homeodomain transcription factor necessary for the commitment of the PIT1 lineage of three cell types—somatotropes, thyrotropes, and lactotropes. In the absence of canonical Notch signaling, resulting from deletion of the *Rbp-J* gene at embryonic day (E) 10.5 in the RP using *Pitx1-Cre* transgenic mice, the progenitors adopt an early-born corticotrope cell fate at the expense of the late-arising PIT1 lineage (Kita et al., 2007; Raetzman et al., 2007; Zhu et al., 2006). Interestingly, the proliferating progenitors, residing in the periluminal region, are still present at the end of embryonic development in the mutant pituitary gland (Zhu et al., 2006). However, the mutant animals died of cleft palate shortly after birth because of broad expression of *Pitx1-Cre* in the oral ectoderm (unpublished data), leaving an open question regarding whether continued Notch signaling is required to maintain these pituitary progenitors in the postnatal period. Recently, it has been suggested that Notch signaling is required for progenitor maintenance based on deletion of the *Notch2* gene in the embryonic RP. However, despite a progressive decrease in the number of pituitary progenitors, these cells remain in the postnatal gland in this animal model, particularly in the anterior lobe (Nantie et al., 2014). An animal model with specific and complete depletion of Notch signaling is required to provide an unambiguous answer.

At birth, all of the endocrine cell lineages are present in the mouse pituitary gland, but the gland continues to grow and mature substantially after birth, particularly during the first few postnatal weeks. It has been documented that this postnatal pituitary gland expansion in the rat is

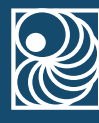

only partially brought about via proliferation of preexisting differentiated hormone-producing cells (Carbajo-Pérez and Watanabe, 1990; Taniguchi et al., 2000, 2001a, 2001b, 2002). Double immunolabeling of hormone and proliferation markers reveals that 10%–30% of the proliferating cells are differentiated endocrine cells, implying that some of the postnatal proliferation might take place in undifferentiated cells. On the other hand, the mature pituitary gland has a low turnover rate under basal conditions (Florio, 2011). However, one important feature of the pituitary gland is its plasticity. The cellular composition of the mature gland can change flexibly to adapt to the physiological or pathological demands of the organism (Levy, 2002). Recently, postnatal pituitary stem cells have been identified based on expression of a variety of stem cell-specific markers, including SOX2, SOX9, E-Cadherin, NES, and the pituitary-specific transcription factor LHX3 (Chen et al., 2009; Fauquier et al., 2008; Garcia-Lavandeira et al., 2009; Gleiberman et al., 2008; Rizzoti, 2010; Vankelecom and Chen, 2014). These cells are localized in the marginal region between the intermediate lobe and the anterior lobe, and, when cultured in vitro, they are capable of self-renewal and differentiation into diverse hormone-producing pituitary cell types, implying their “stemness.” In vivo characterizations of these SOX2<sup>+</sup> cells have shown that they are most abundant in the neonatal pituitary gland (Gremeaux et al., 2012). Recent studies of cell ablation of terminally differentiated cells have suggested that these SOX2<sup>+</sup> cells may contribute to pituitary regeneration (Fu et al., 2012; Fu and Vankelecom, 2012). In addition, lineage tracing of SOX2<sup>+</sup>, SOX9<sup>+</sup> cells have provided genetic evidence that these cells can contribute to organ homeostasis and tissue adaptation (Andoniadou et al., 2013; Rizzoti et al., 2013). Expression of the Notch signaling component in postnatal stem cells has been described previously (Chen et al., 2006, 2009; Nantie et al., 2014; Tando et al., 2013; Vankelecom and Gremeaux, 2010). Interfering with Notch activation affects stem cell number in pituitary primary culture, implicating a critical role of Notch signaling in stem cell proliferation (Chen et al., 2006; Nantie et al., 2014; Tando et al., 2013). However, whether Notch signaling is essential for pituitary stem cell proliferation in vivo and whether these cells are necessary for any normal physiological pituitary functions remains unknown.

Here we demonstrate that postnatal pituitary SOX2<sup>+</sup> stem cells are derived from the embryonic RP and that the Notch signaling pathway is essential for their proliferation, maintenance, and postnatal pituitary expansion. Furthermore, we present evidence that SOX2<sup>+</sup> stem cells make a significant contribution to neonatal pituitary expansion but that they gradually switch to an essentially quiescent state so that they are no longer required for homeostasis and tissue plasticity in the mature gland. Our results suggest that

committed cells are capable of adapting to physiological demands and contribute to pituitary gland plasticity.

## RESULTS

### Notch Signaling Is Active in Pituitary Postnatal Stem Cells

Components of the Notch signaling pathway exhibit dynamic expression patterns during pituitary organogenesis. Their expression is high in the RP but becomes attenuated at E13.5 in the perspective anterior lobe as cells begin to undergo lineage commitment (Raetzman et al., 2004; Zhu et al., 2006). However, we observed that the expression of *Notch2*, *Dll1*, *Dll3*, and the downstream target gene *Hes1* persists in the periluminal region at E17.5, where the prospective postnatal pituitary stem cells reside (Figure 1A; Figures S1A–S1D). To further elucidate the status of Notch signaling in postnatal stem cells, we performed immunofluorescence staining using a specific anti-Hes1 antibody (Figure 1B). All periluminal cells express SOX2 and E-Cadherin, and most of them express Hes1, suggesting that Notch signaling remains active in these cells. Double immunolabeling revealed that some of the SOX2<sup>+</sup> stem cells co-expressed SOX9, LHX3, NES, and PROP1 (Figures 1C–1F; Figures S1E–S1H). Interestingly, SOX9 appears to be more highly expressed in the periluminal layer next to the intermediate lobe, whereas LHX3 and PROP1 are more expressed toward the anterior lobe. These results, collectively, imply heterogeneity within the stem cell population.

### Generation of the *Prop1-Cre* Transgenic Mice

To circumvent the neonatal lethality and early developmental defects in the *Rbp-<sup>fl/fl</sup>*, *Pitx1-Cre* mice as described before (Zhu et al., 2006), we generated a *Cre* line using the genetic information of the *Prop1* gene to drive expression exclusively in the RP during pituitary organogenesis. We learned that the first intron of the *Prop1* gene is essential for its expression based on the following observations. First, in the previously generated *Prop1* knockout mice, where exons 2 and 3 and all introns were replaced with in-frame fusion of the *LacZ* cassette, *LacZ* failed to be expressed (Olson et al., 2006). Second, the first intron of the *Prop1* gene is evolutionarily conserved and is required to maintain *Prop1* gene expression in response to early Notch signaling (Zhu et al., 2006). Consistent with these findings, it was shown later that the first intron of the *Prop1* gene can function as a pituitary-specific enhancer when placed together with a heterogeneous promoter (Ward et al., 2007). We mapped the critical region to a 2.2-kb promoter/enhancer region of the *Prop1* gene, comprised of approximately 0.7 kb of promoter sequence, the first exon, and the first intron region (unpublished data). We subsequently generated *Prop1-Cre*

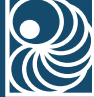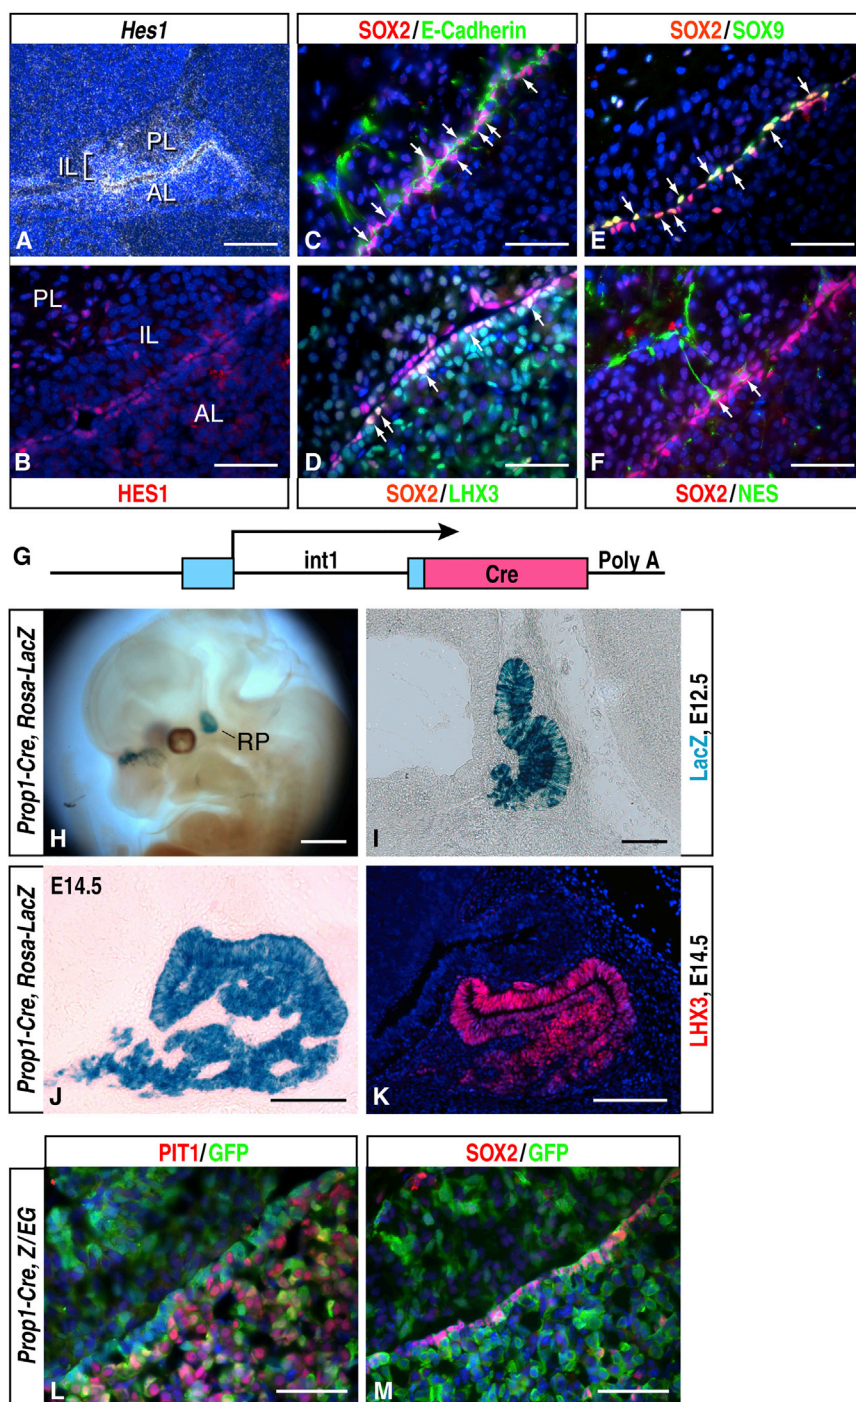

### Figure 1. Characterizations of Pituitary Stem Cells and *Prop1-Cre* Transgenic Mice

(A) In situ hybridization of the Notch target gene *Hes1* at E17.5 revealed that it is highly expressed in the periluminal region.

(B–F) Immunofluorescence staining of *Hes1* (B), SOX2/E-Cadherin (C), SOX2/LHX3 (D), SOX2/SOX9 (E), and SOX2/NES (F) in a 2-month-old pituitary gland. Arrows indicate representative double-positive cells.

(G) The *Prop1-Cre* transgenic line is driven by the 2.2-kb promoter/enhancer region of the *Prop1* gene. Blue boxes, exons 1 and 2; int1, intron 1.

(H–J) LacZ reporter analysis of *Prop1-Cre*, *Rosa-LacZ* embryos in whole-mount (H) and middle sagittal frozen sections at E12.5 (I) and E14.5 (J). LacZ activity at E14.5 is detected in all cells in the anterior and intermediate lobes of the embryonic pituitary gland. It is noted that ectopic Cre activity is detected in the olfactory epithelium (H).

(K) Immunofluorescence staining of LHX3 at E14.5.

(L and M) Dual immunofluorescence staining of GFP/PIT1 and GFP/SOX2 in a *Prop1-Cre*, *Z/EG* postnatal day 22 pituitary gland. AL, anterior lobe; IL, intermediate lobe; PL, posterior lobe. Scale bars, 200  $\mu$ m (A); 50  $\mu$ m (B–F, L, and M), 500  $\mu$ m (H), 100  $\mu$ m (I–K).

transgenic mice using the same genomic information (Figure 1G). This *Cre* line expresses CRE in many cells in the RP at E12.5, similar to endogenous PROP1 expression (Figures S1I–S1J) and, consistently, when crossed with *Rosa26-LacZ* reporter mice, can mediate *LoxP* recombination in many RP progenitors at E12.5, as evidenced by LacZ staining on whole mounts and sections (Figures 1H and 1I) and in

almost all cells in the anterior and intermediate lobes of the pituitary gland at E14.5 and postnatal day (P)0 (Figure 1J; Figure S1K). The LacZ activity at E14.5 is almost identical to the expression pattern of LHX3 (Figure 1K), a critical transcription factor required for early pituitary development and expressed in every embryonic endocrine cell type and their precursors. Therefore, the *Prop1-Cre* line can effectively



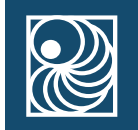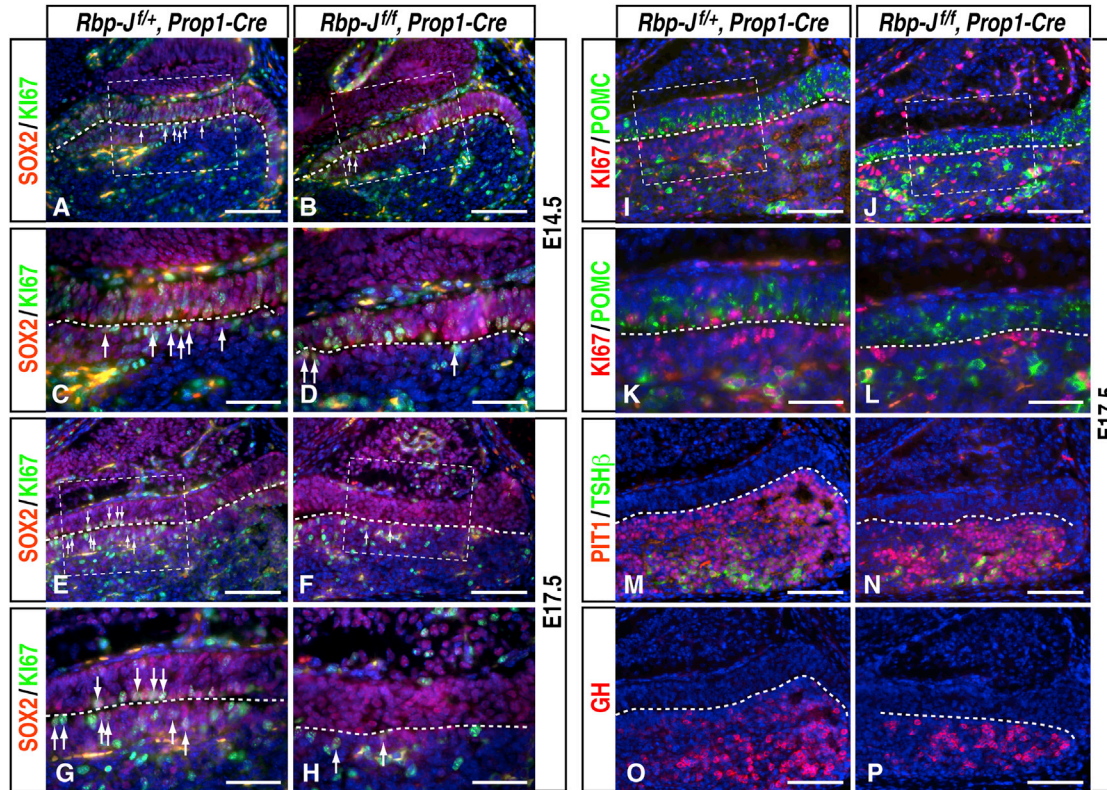

### Figure 2. Proliferating SOX2<sup>+</sup> Progenitor Cells in the Embryonic Pituitary Gland Are Reduced in *Rbp-J<sup>fl/fl</sup>, Prop1-Cre* Mutants

(A–H) Double immunofluorescence labeling of SOX2 and KI67 of wild-type controls (A, C, E, and G) and *Rbp-J<sup>fl/fl</sup>, Prop1-Cre* mutants (B, D, F, and H) at E14.5 (A–D) and E17.5 (E–H) showed reduced numbers of SOX2<sup>+</sup> KI67<sup>+</sup> cells in the *Rbp-J<sup>fl/fl</sup>, Prop1-Cre* mutants, initially in the anterior lobe at E14.5 and later in the intermediate lobe at E17.5. Arrows indicate representative double-positive cells.

(I–L) Double immunofluorescence labeling of POMC and KI67 at E17.5 revealed that periluminal KI67<sup>+</sup> cells in the intermediate lobe (I and K) are absent in the *Rbp-J<sup>fl/fl</sup>, Prop1-Cre* mutants (J and L).

(M and N) Double immunofluorescence labeling of PIT1 and TSHβ at E17.5. The anterior lobe in the mutant (N) is smaller than in the wild-type control (M), with reduced numbers of PIT1<sup>+</sup> and TSHβ<sup>+</sup> cells.

(O and P) Immunofluorescence labeling of GH in the wild-type control (O) and *Rbp-J<sup>fl/fl</sup>, Prop1-Cre* mutants (P) at E17.5.

The dashed lines indicate the lumen between the intermediate and anterior lobes. The dashed areas in (A), (B), (E), (F), (I), and (J) are also presented in (C), (D), (G), (H), (K), and (L), respectively. Scale bars, 100 μm (A, B, E, F, I, J, and M–P) and 50 μm (C, D, G, H, K, and L).

mediate recombination in the RP and label almost all cells in the anterior and intermediate lobes of the pituitary gland. Moreover, to probe the origin of pituitary postnatal SOX2<sup>+</sup> cells, we crossed *Prop1-Cre* with *Z/EG* reporter mice, with double immunofluorescence labeling in the postnatal pituitary gland from *Prop1-Cre, Z/EG* mice, revealing that EGFP is co-labeled with SOX2<sup>+</sup> as well as PIT1<sup>+</sup> cells, suggesting that postnatal SOX2<sup>+</sup> stem cells are derived from the embryonic RP progenitors (Figures 1L and 1M).

### Notch Signaling Is Required to Maintain Pituitary Stem Cells

To explore the potential functions of Notch signaling in late pituitary organogenesis and postnatal stem cells, we generated *Rbp-J<sup>fl/fl</sup>, Prop1-Cre* mice. At E12.5 in pituitary

development, all RP progenitor cells express SOX2, and most of the luminal SOX2<sup>+</sup> cells are proliferating, as revealed by double-labeling of SOX2 and KI67 (Figure S1L). By E14.5, expression of SOX2 is confined to the intermediate lobe and periluminal cells in the anterior lobe (Figures 2A and 2C). In the mutant embryos, the number of proliferating SOX2<sup>+</sup>KI67<sup>+</sup> progenitor cells was decreased at E14.5 (Figures 2B and 2D). By E17.5, there were no KI67<sup>+</sup> cells detectable in the intermediate lobe, and they were decreased markedly in the periluminal region of the anterior lobe (Figures 2E–2H). Expression of LHX3 at E17.5 is similar to that of SOX2, high in the intermediate lobe and periluminal cells of the anterior lobe. Consistently, in the mutant embryos, there was a reduction in the number of LHX3<sup>+</sup> KI67<sup>+</sup> cells in the periluminal region (Figures



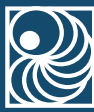

S2A–S2D). No increased apoptosis was observed in the mutants by either terminal deoxynucleotidyl transferase dUTP nick-end labeling (TUNEL) assay or immunofluorescence labeling with activated caspase-3 (Figures S2E–S2H). In addition, the intermediate lobe at E17.5 in the mutant was populated with POMC<sup>+</sup> melanotropes, consistent with the idea that SOX2<sup>+</sup> KI67<sup>+</sup> cells may differentiate prematurely into melanotropes (Figures 2I–2L). On the other hand, the ontogeny of PIT1<sup>+</sup> lineages in the anterior lobe, which is mutually exclusive with SOX2<sup>+</sup> cells (Figures S2I–S2L), occurred at the appropriate times. There was, however, a decrease in the number of PIT1<sup>+</sup> cells, including GH<sup>+</sup> somatotropes and TSHβ<sup>+</sup> thyrotropes (Figures 2M–2P; Figures S2M and S2N), perhaps because of progressive depletion of the SOX2<sup>+</sup> KI67<sup>+</sup> progenitors.

The SOX2<sup>+</sup> cells were examined further in postnatal pituitary glands (Figure 3). At P0, SOX2<sup>+</sup> E-Cadherin<sup>+</sup> stem cells were present in the periluminal region and as small clusters in the anterior lobe in the wild-type pituitaries. By contrast, in the mutant gland, these SOX2<sup>+</sup> cells were largely absent, except for a few remaining cells with reduced levels of SOX2 and E-Cadherin (Figures 3A and 3B). Expression of PROP1, which was present in some SOX2<sup>+</sup> stem cells in the wild-type control, was largely undetectable in the mutant gland (Figures 3C and 3D). By P10, the periluminal pituitary stem cells as well as stem cell clusters in the anterior lobe, characterized by SOX2, SOX9, and E-Cadherin labeling, were almost completely absent in the mutant glands (Figures 3E–3H). Consistent with these observations, RNA levels of the *Sox2*, *E-Cadherin*, and *Prop1* genes as well as the Notch downstream target *Hes1* were downregulated in the mutant pituitary glands, detected by qRT-PCR (Figure 3I). Therefore, in the absence of Notch signaling after the onset of *Prop1* expression in the RP, the SOX2<sup>+</sup> progenitor cells in the RP fail to maintain self-renewal, leading to a reduced population of proliferative progenitors and, consequently, a complete depletion of pituitary stem cells in the postnatal pituitary gland.

As expected, the mutant mice were able to survive until adulthood. They were smaller than their age-matched wild-type controls by body weight (Figures S3A and S3B), and the pituitary glands of mutant animals were hypoplastic. Immunofluorescence staining revealed that all cell types in the anterior lobe were present but with a reduced number (Figures 3J–3Q). The intermediate lobe, labeled by POMC staining, which encloses the posterior lobe and separates the posterior lobe from the anterior lobe in wild-type glands, expanded laterally in the mutants, whereas the medial regions of the gland lacked intermediate lobe cells and, as a result, allowed direct contact between the anterior and posterior lobes (Figures 3P and 3Q). Moreover, to further verify that SOX2<sup>+</sup> stem cells were absent in mutant glands, *in vitro* pituitary cultures

were established. Pituitary spheres, labeled by SOX2 staining, were readily detectable in wild-type culture, whereas there were barely any in the mutant culture (Figures 3R–3T). Collectively, these data demonstrate that Notch signaling is essential for the proliferation and maintenance of postnatal pituitary stem cells as well as the size and morphology of the pituitary gland.

To examine whether Notch signaling is required cell-autonomously in SOX2<sup>+</sup> cells for their maintenance, we generated *Rbp-J<sup>fl/fl</sup>*, *Sox2-Cre<sup>ERT2</sup>* mice. Tamoxifen was injected for two consecutive days, and pituitary glands were characterized 21 days later. There was a clearly decrease in the number of SOX2<sup>+</sup> cells in the mutant, particularly in the very lateral periluminal region (Figures S3C–S3E). However, large numbers of SOX2<sup>+</sup> cells still remained in the periluminal region as well as in the anterior lobe, probably because *Sox2-Cre<sup>ERT2</sup>* cannot effectively label all SOX2<sup>+</sup> cells after tamoxifen induction (Rizzoti et al., 2013; unpublished data). Additionally, chemical inhibition of Notch signaling by N-[N-(3,5-difluorophenacetyl)-L-alanyl]-S-phenylglycine t-butyl ester (DAPT) in the pituitary sphere culture resulted in a significant reduction in the number of pituitary spheres (Figure S3F). Therefore, Notch activation in SOX2<sup>+</sup> cells is necessary for their proliferation and maintenance.

### Prop1 Functions Downstream of Sox2

It has been shown previously that expression of *Prop1* in RP is directly regulated by Notch signaling (Nantie et al., 2014; Zhu et al., 2006). Here we demonstrated that Notch signaling is required for maintaining SOX2<sup>+</sup> cells in the postnatal gland and that expression of PROP1 in SOX2<sup>+</sup> stem cells is absent when Notch signaling is ablated (Figures 3C and 3D), suggesting that PROP1 may function downstream of SOX2. Consistent with this notion, it has been reported that *Prop1* is downregulated in pituitary-specific *Sox2* conditional knockout embryos (Jayakody et al., 2012). To understand whether PROP1 might reciprocally regulate SOX2 expression, we examined SOX2<sup>+</sup> cells in *Prop1<sup>-/-</sup>* mice. Immunofluorescence of SOX2 at P10 revealed that SOX2<sup>+</sup> stem cells still persist in the periluminal region, as well as in the anterior lobe, in the absence of *Prop1* (Figures S3G and S3H). Together, these results suggest that SOX2 functions upstream of PROP1.

### Functions of SOX2<sup>+</sup> Stem Cells and Notch Signaling in the Postnatal Expansion of the Pituitary Gland

Through deletion of *Rbp-J* using *Prop1-Cre*, we generated animals that survive after birth but lack SOX2<sup>+</sup> stem cells and are defective in Notch activation in the pituitary gland. This provided us with an animal model in which to investigate the roles of SOX2<sup>+</sup> cells and Notch signaling in postnatal pituitary gland function and homeostasis.

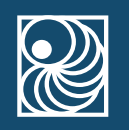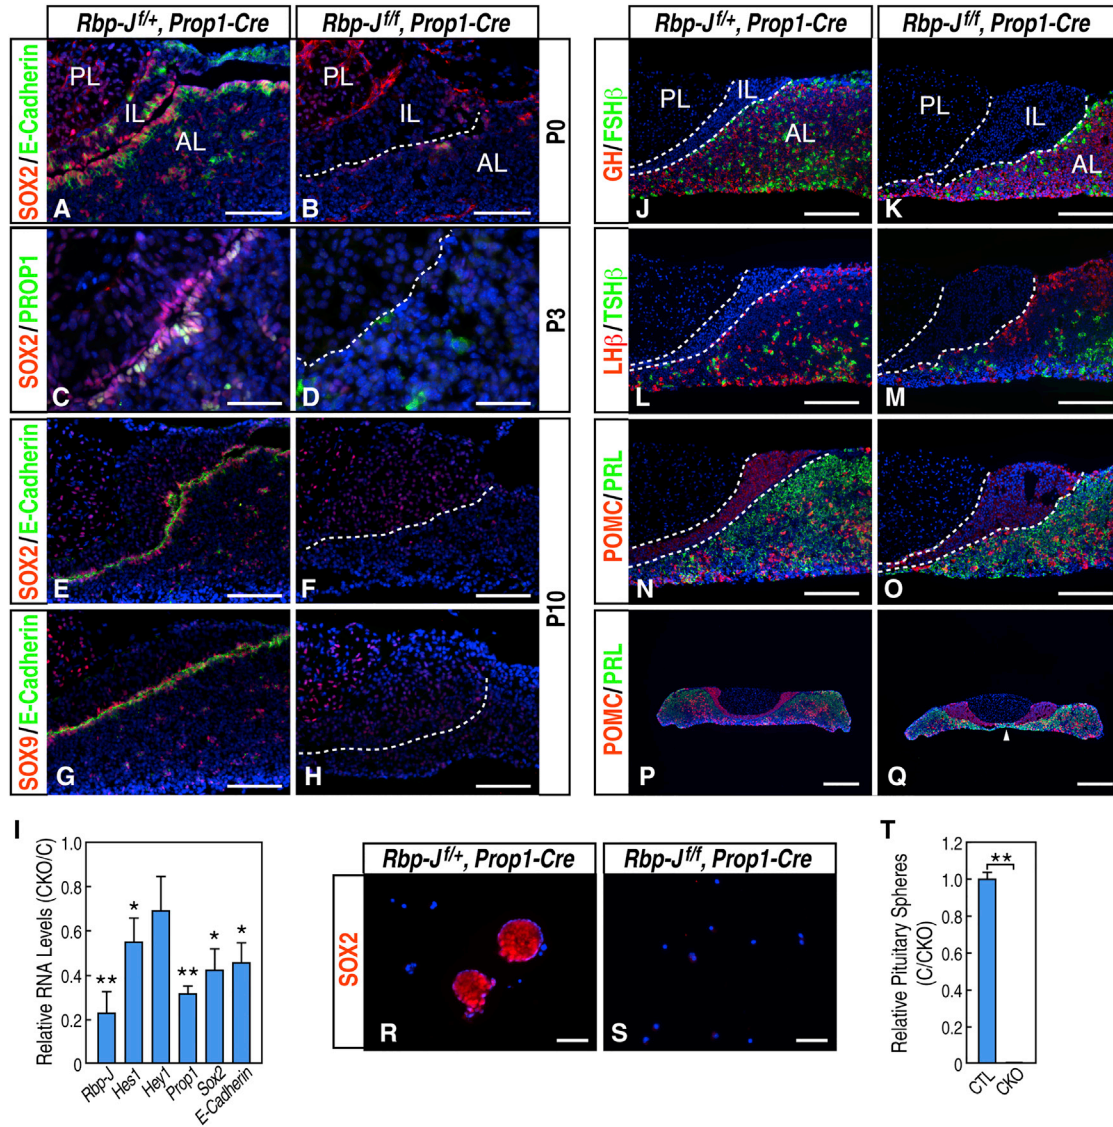

### Figure 3. SOX2<sup>+</sup> E-Cadherin<sup>+</sup> Pituitary Stem Cells Are Depleted Gradually in Hypoplastic and Dysmorphic Pituitary Glands in Postnatal *Rbp-J<sup>fl/fl</sup>, Prop1-Cre* Mutants

(A–H) Double immunofluorescence labeling of SOX2/E-Cadherin (A, B, E, and F; magnification, 200 $\times$ ), SOX2/PROP1 (C and D; magnification, 400 $\times$ ), and SOX9/E-Cadherin (G and H; magnification, 200 $\times$ ) at P0 (A and B), P3 (C and D), and P10 (E–H) in wild-type controls (A, C, E, and G) and *Rbp-J<sup>fl/fl</sup>, Prop1-Cre* mutants (B, D, F, and H).

(I) qRT-PCR of a 3-month-old wild-type control and *Rbp-J<sup>fl/fl</sup>, Prop1-Cre* mutant pituitary revealed reduced expression of *Rbp-J*, *Hes1*, *Hey1*, *Prop1*, *Sox2*, and *E-Cadherin*. Data are represented as mean  $\pm$  SEM (n = 3 mice). \*p < 0.05, \*\*p < 0.01. CKO/C, conditional knockout/control. (J–Q) Immunofluorescence labeling of GH/FSH $\beta$  (J and K), LH $\beta$ /TSH $\beta$ , and POMC/PRL (N–Q) in 1-month-old wild-type controls (J, L, N, and P) and *Rbp-J<sup>fl/fl</sup>, Prop1-Cre* mutants (K, M, O, and Q) showed that all cell types are present in the mutant glands. Lower magnification (25 $\times$ ) of the gland (P and Q) revealed that, in the *Rbp-J<sup>fl/fl</sup>, Prop1-Cre* mutants, the intermediate lobe is expanded laterally and discontinued in the ventral medial region, leading to a direct interaction of the anterior lobe with the posterior lobe (arrowhead).

(R–T) Immunofluorescence labeling of SOX2 (R and S) and quantification (T) of pituitary spheres cultured from a 3-month-old wild-type control (CTL) and *Rbp-J<sup>fl/fl</sup>, Prop1-Cre* mutant. Data are represented as mean  $\pm$  SEM (n = 3 mice). \*p < 0.05, \*\*p < 0.01.

Scale bars, 100  $\mu$ m (A, B, and E–H), 50  $\mu$ m (C and D), 200  $\mu$ m (J and O), 500  $\mu$ m (P and Q), and 75  $\mu$ m (R and S).



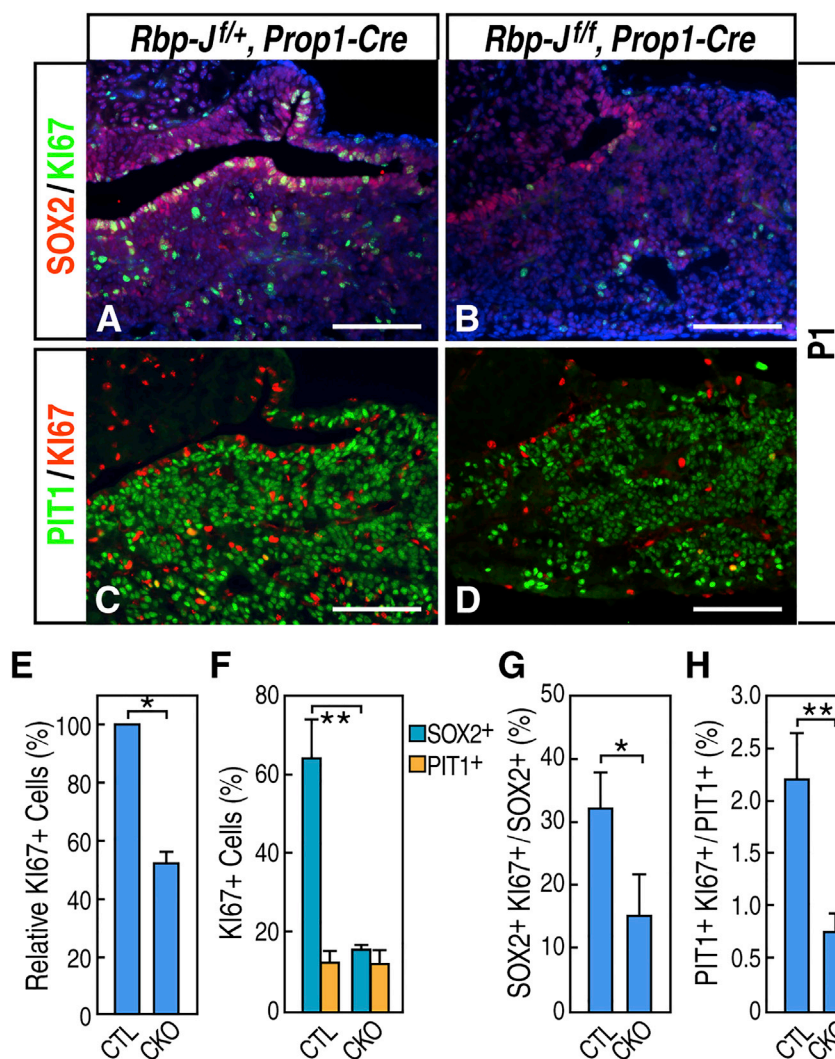

**Figure 4. Both SOX2<sup>+</sup> Stem Cells and PIT1<sup>+</sup> Cells Exhibit Reduced Proliferation in the Anterior Lobe of *Rbp-J<sup>f/f</sup>, Prop1-Cre* Mutants at P1**

(A–D) Double immunofluorescence labeling of SOX2/KI67 (A and B) and PIT1/KI67 (C and D) in wild-type control (A and C) and *Rbp-J<sup>f/f</sup>, Prop1-Cre* mutants (B and D) at P1. (E) Quantification of KI67<sup>+</sup> proliferating cells in the anterior lobe of the control and mutant (CKO) at P1. Data are represented as mean ± SEM (n = 3 mice, \*p < 0.05). (F) Quantification of SOX2<sup>+</sup> and PIT1<sup>+</sup> cells among KI67<sup>+</sup> proliferating cells in the control and mutant. Data are represented as mean ± SEM (n = 3 mice, \*\*p < 0.01). (G) Quantification of SOX2<sup>+</sup> KI67<sup>+</sup> cells among SOX2<sup>+</sup> cells. Data are represented as mean ± SEM (n = 3 mice, \*p < 0.05). (H) Quantification of PIT1<sup>+</sup> KI67<sup>+</sup> cells among PIT1<sup>+</sup> cells. Data are represented as mean ± SEM (n = 3 mice, \*\*p < 0.01). Scale bars, 100 μm.

Because pituitary glands undergo expansion after birth, we first examined whether postnatal pituitary stem cells are required for this initial postnatal growth. At P1 in the wild-type pituitary gland, both periluminal stem cells and stem cell clusters in the anterior lobe continued to proliferate, and they represented approximately 64% of all KI67<sup>+</sup> proliferating cells in the anterior lobe (Figures 4A and 4F). Meanwhile, after an initial cell-cycle arrest accompanying lineage commitment and terminal differentiation during embryonic development, PIT1<sup>+</sup> cells resumed proliferation, and they represented approximately 12% of all KI67<sup>+</sup> cells in the anterior lobe (Figures 4C and 4F). By contrast, in the mutant glands, where most of the SOX2<sup>+</sup> stem cells were absent, the total number of KI67<sup>+</sup> proliferating cells was reduced significantly to 51% of the controls (Figure 4E), of which about 16% represented the remaining SOX2<sup>+</sup> cells (Figure 4F). Furthermore, the proportion of SOX2<sup>+</sup> cells that were proliferating (SOX2<sup>+</sup>KI67<sup>+</sup>/SOX2<sup>+</sup>)

was also decreased greatly (Figure 4G), consistent with the idea that the remaining SOX2<sup>+</sup> stem cells failed to maintain self-renewal in the absence of Notch signaling. Interestingly, the proportion of PIT1<sup>+</sup> cells that were proliferating (PIT1<sup>+</sup>KI67<sup>+</sup>/PIT1<sup>+</sup>) in the mutants was also decreased significantly (Figure 4H), suggesting a delay of PIT1<sup>+</sup> cells in their re-entry into the cell cycle in the mutants. Taken together, these data suggest that SOX2<sup>+</sup> stem cells make a significant contribution to neonatal pituitary expansion and that SOX2<sup>+</sup> stem cells and Notch signaling are also required to ensure proper timing of re-entry of PIT1<sup>+</sup> cells into the cell cycle.

However, despite a progressively diminished postnatal stem cell population and decreased cell proliferation at P1, the mutant pituitary glands continued to proliferate and expand postnatally. At P10, the labeling index in the anterior lobe of the mutant gland is similar to that of the wild-type control, in contrast to P1, when a significant

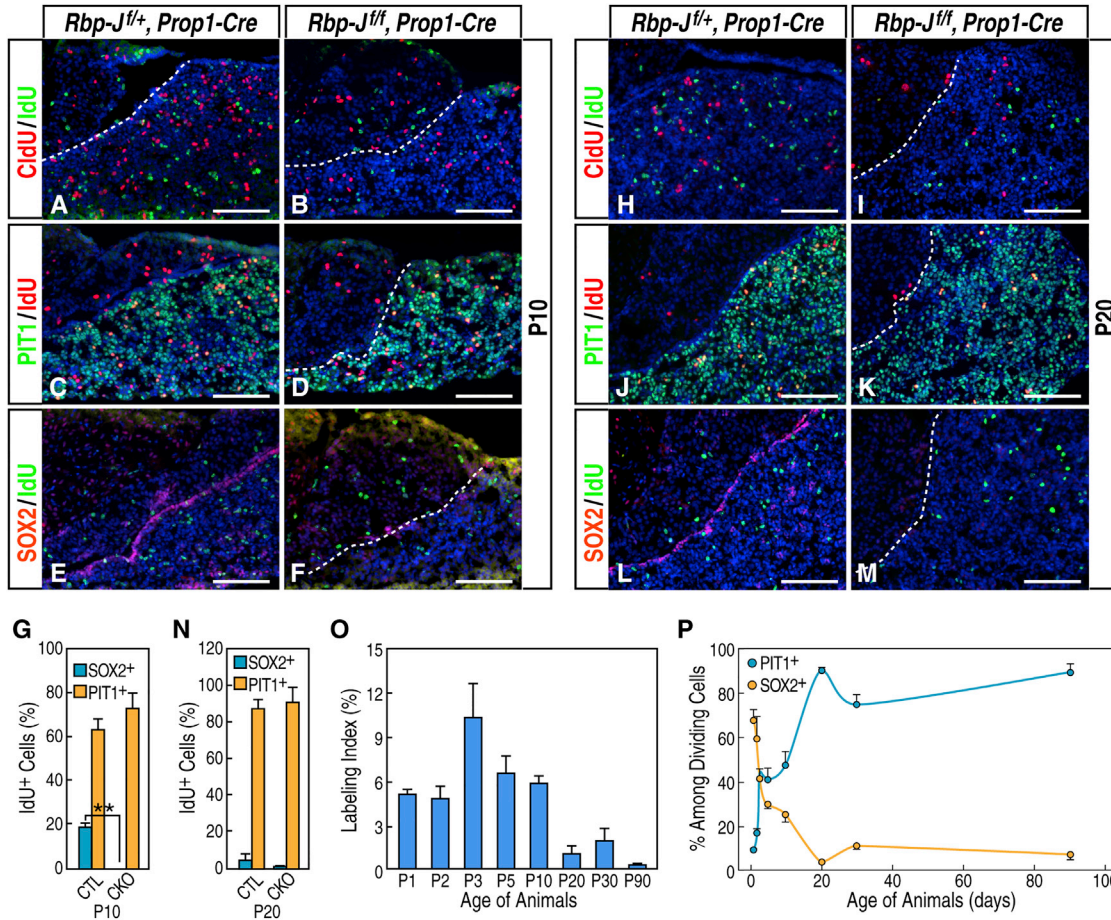

**Figure 5. Proliferation of SOX2<sup>+</sup> Cells Is Diminished Gradually, and PIT1<sup>+</sup> Cells Make up the Majority of Proliferating Cells in the Postnatal Pituitary Gland**

(A–F) Double immunofluorescence labeling of CldU/IdU (A and B), PIT1/IdU (C and D), and SOX2/IdU (E and F) in the wild-type control (A, C, and E) and *Rbp-J<sup>fl/fl</sup>, Prop1-Cre* mutants (B, D, and F) at P10.

(G) Quantification of PIT1<sup>+</sup> or SOX2<sup>+</sup> cells among dividing cells at P10. Data are represented as mean ± SEM (n = 3 mice, \*\*p < 0.01).

(H–M) Double immunofluorescence labeling of CldU/IdU (H and I), PIT1/IdU (J and K), and SOX2/IdU (L and M) in the wild-type control (H, J, and L) and *Rbp-J<sup>fl/fl</sup>, Prop1-Cre* mutants (I, K, and M) at P20.

(N) Quantification of PIT1<sup>+</sup> or SOX2<sup>+</sup> cells among dividing cells at P20. Data are represented as mean ± SEM (n = 3 mice).

(O) Labeling index of the wild-type pituitary glands at different postnatal stages. Data are represented as mean ± SEM (n = 3 mice).

(P) Respective quantification of PIT1<sup>+</sup> and SOX2<sup>+</sup> cells among IdU<sup>+</sup> dividing cells in the anterior lobe of wild-type pituitaries at different postnatal stages. Data are represented as mean ± SEM (n = 3 mice).

Scale bars, 100 μm.

difference was observed (Figure S4). To further examine the proliferation dynamics, we performed a double-thymidine analog incorporation assay by administering 5-chloro-2'-deoxyuridine (CldU) and 5-Iodo-2'-deoxyuridine (IdU) on consecutive days. CldU/IdU double labeling starting at P10 revealed that, in wild-type animals, dividing cells were present in all three lobes of the pituitary gland (Figures 5A–5F; and data not shown). At this stage, 63% of the dividing cells in the anterior lobe were PIT1<sup>+</sup> cells (PIT1<sup>+</sup> IdU<sup>+</sup>/IdU<sup>+</sup>), and a relatively smaller proportion of dividing cells (19%) were SOX2<sup>+</sup> stem cells. Similarly, in

the mutants, PIT1<sup>+</sup> cells continued to proliferate in the absence of postnatal SOX2<sup>+</sup> stem cells and represented the majority of dividing cells (72%) (Figure 5G). Therefore, expansion of the postnatal gland at this stage was largely contributed to by proliferation of existing, committed cells rather than pituitary SOX2<sup>+</sup> stem cells. Furthermore, double labeling of CldU and IdU revealed that there were barely any detectable CldU<sup>+</sup> IdU<sup>+</sup> cells in either the anterior lobe or in the periluminal region (Figures 5A and 5B), suggesting that, in contrast to the intestine or other organs with fast cell turnover, there were no transiently amplifying





progenitor cells that may contribute to the postnatal expansion of the pituitary gland at this stage. Instead, dividing cells in the pituitary gland appear to enter a resting period and do not immediately reenter the cell cycle. Similar CldU/IdU labeling performed at P20 showed that postnatal SOX2<sup>+</sup> stem cells were mostly quiescent and not dividing actively at this stage, whereas PIT1<sup>+</sup> cells made up about 87% of the dividing cells in the anterior lobe in both the wild-type and mutants, and no transiently amplifying progenitor cells were detected (Figures 5H–5N).

To further characterize cell divisions in postnatal pituitary gland expansion, single IdU labeling at different postnatal time points was performed in wild-type animals. Immunofluorescence assays and further analyses revealed that the overall labeling index in the anterior lobe peaked at P3 and then decreased gradually (Figure 5O). Quantifications of dividing cells among SOX2<sup>+</sup> and PIT1<sup>+</sup> cells, respectively, revealed that the actively dividing SOX2<sup>+</sup> stem cells declined significantly, transitioning from a highly proliferative state in the neonatal stages to near quiescence a few weeks after birth, whereas PIT1<sup>+</sup> cells exhibited a temporally delayed wave of proliferation and became mostly quiescent as well (Figures S5A and S5B). In the process of postnatal expansion, PIT1<sup>+</sup> cells gradually increased in cell number and, ultimately, represented large proportions of dividing cells in the mature pituitary gland (Figure 5P; Figure S5C).

To examine the contribution of SOX2<sup>+</sup> cells in the postnatal pituitary gland, we carried out lineage tracing experiments using *Sox2-Cre<sup>ERT2</sup>*, *ROSA26-EYFP* mice (Arnold et al., 2011). Tamoxifen was injected for two consecutive days at P1 and P2, and animals were analyzed at P15. Consistent with observations from others (Andoniadou et al., 2013; Rizzoti et al., 2013), we observed that the majority of YFP<sup>+</sup> cells remained as SOX2<sup>+</sup> stem cells and that only a small percentage of YFP<sup>+</sup> stem cells eventually differentiated into distinct pituitary endocrine cells (Figure S5D; unpublished data).

In conclusion, these results, collectively, suggest that SOX2<sup>+</sup> stem cells are critical for neonatal pituitary expansion by self-renewal, differentiating into distinct pituitary cell lineages, and that Notch signaling is essential for postnatal expansion largely by maintaining SOX2<sup>+</sup> cells and regulating the proper timing of PIT1<sup>+</sup> cell re-entry into the cell cycle.

### Roles of Pituitary Postnatal Stem Cells in Pituitary Plasticity

An interesting feature of the pituitary gland is its plasticity. The composition and cell content of the gland changes to meet the physiological demands. One example is that the number of lactotropes in the rat pituitary gland increases 3-fold during pregnancy and lactation (Levy, 2002). It is generally believed that transdifferentiation and increased

lactotrope proliferation account for this change, although, in the mouse, no lactotroph transdifferentiation has been observed during pregnancy and lactation (Castrique et al., 2010). However, it is not known whether pituitary stem cells play a role in these processes. We therefore probed the possibility of whether pituitary stem cells, although mostly quiescent during their adult life, might reenter the cell cycle and function in these processes. We examined cell proliferation in the pituitary glands of wild-type pregnant females on days 13 and 18 of pregnancy and day 7 of lactation as well as in age-matched virgin females (Figure 6). Overall, cell proliferation in the pituitary gland increased toward the end of pregnancy at E18.5 and while lactating at P7. Double labeling of SOX2/KI67 and PIT1/KI67 revealed that SOX2<sup>+</sup> stem cells did not undergo enhanced proliferation under these conditions. In contrast, PIT1<sup>+</sup> cells were still the major proliferating cells in the anterior lobe. Among them, only a very small number of PRL<sup>+</sup> KI67<sup>+</sup> cells could be identified (Figure 6). Similar proliferation dynamics were observed in mutant pituitary glands (Figure S6). These data suggest that SOX2<sup>+</sup> stem cells remain mostly quiescent in these processes and are unlikely to play a significant role during pregnancy and lactation. This is consistent with our observation that the number and size of litters generated from mutant females were not significantly different from those of control wild-type females, and the mutant females did not exhibit any detectable defects in lactation ( $8.4 \pm 0.9$ /litter for wild-type and  $7.7 \pm 0.9$ /litter for mutant animals, mean  $\pm$  SEM,  $n = 3$  litters,  $p = 0.12$ ; data not shown). Therefore, we conclude that Notch signaling and Notch-dependent SOX2<sup>+</sup> stem cells are not absolutely required for pituitary functions in the process of pregnancy and lactation.

A second example of pituitary plasticity is characterized by the fact that there are increases in the number of proliferating cells and in the number of corticotropes in response to bilateral adrenalectomy (ADX) because of disruption of the negative feedback imposed by glucocorticoid from the target organ, the adrenal gland (Levy, 2002; Nolan and Levy, 2006). qRT-PCR from wild-type pituitary glands after ADX showed increases in the RNA levels of *Pomc* and the proliferating marker *Ki67* (Figure 7A). Interestingly, RNA levels of glucocorticoid receptor (*GR*) declined gradually, compatible with the idea that there is a disruption of negative feedback upon ADX. We questioned whether postnatal pituitary stem cells make up those proliferating cells after ADX in the pituitary gland. We performed surgery in wild-type animals. Double immunofluorescence labeling of SOX2/CldU in wild-type animals revealed that SOX2<sup>+</sup> cells contributed to 2.2% of cells labeled with CldU in sham surgery, and the respective contribution changed to 6.9% upon ADX (Figures 7B–7F). These data suggest that SOX2<sup>+</sup> stem cells could be

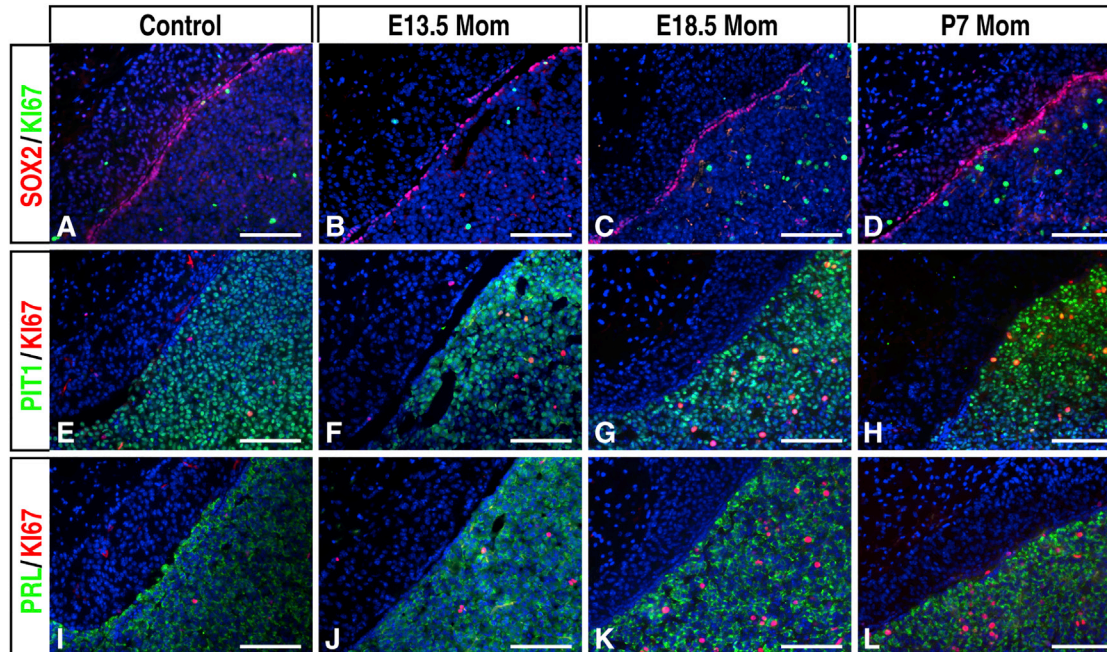

**Figure 6. Characterization of Proliferating Cells in 3-Month-Old Wild-Type Control Mice during Pregnancy and Lactation**

(A–L) Double immunofluorescence labeling of SOX2/Ki67 (A–D), PIT1/Ki67 (E–H), and PRL/Ki67 (I–L) at different stages of pregnancy and lactation. Scale bars, 100  $\mu$ m.

reactivated to proliferate by ADX. However, SOX2<sup>+</sup> stem cells were not the only cell types that were stimulated to proliferate upon ADX. PIT1<sup>+</sup> cells as well as ACTH<sup>+</sup> corticotropes also exhibited increased proliferation, with PIT1<sup>+</sup> cells representing the majority of proliferating cells and ACTH<sup>+</sup> corticotropes representing a much lower proportion than SOX2<sup>+</sup> cells (Figures 7D, 7E, 7G, and 7H; data not shown). Consistently, GR expression was detected in PIT1<sup>+</sup> cells (Figure S7). These results suggest that ADX-induced cell proliferation in the pituitary gland is not cell type specific. We also performed similar experiments in both control littermates and the mutant mice. ADX induced an ~3-fold increase in the number of cells incorporating CldU in the anterior lobe of wild-type pituitary glands. We did not detect a significant deficit in the responses to ADX in the mutant animals with respect to both the increase in the number of proliferating cells and the increase of ACTH<sup>+</sup> cells (Figures 7G–7K). These results reveal that ADX can elicit general reactivation of multiple cell types in the pituitary gland and that SOX2<sup>+</sup> stem cells make a limited contribution to the overall responses in the pituitary gland.

## DISCUSSION

Adult stem cells have been identified in the postnatal pituitary gland. These are groups of heterogeneous cells ex-

pressing SOX2, SOX9, LHX3, PROP1, E-Cadherin, and NES located either in the marginal zone between the intermediate and anterior lobes or scattered in the anterior lobe (Chen et al., 2009; Fauquier et al., 2008; Garcia-Lavandeira et al., 2009; Gleiberman et al., 2008; Rizzoti, 2010; Vankelecom and Chen, 2014). It has been suggested previously that mouse pituitary adult stem cells are uniquely set aside during embryonic pituitary development and only contribute prominently to postnatal pituitary growth (Gleiberman et al., 2008). In this study, we showed that these stem cells were labeled by the LacZ or GFP reporters in the lineage-tracing experiment using the RP-specific *Prop1-Cre* line, suggesting that pituitary stem cells are derived from the embryonic RP progenitors and that they continue to proliferate and differentiate to contribute to postnatal pituitary expansion. One common feature of RP progenitors and postnatal stem cells is their expression of the transcription factor SOX2, which has been determined to be expressed in many adult stem cells (Andoniadou et al., 2013; Arnold et al., 2011; Rizzoti et al., 2013).

In this study, we demonstrate that postnatal pituitary SOX2<sup>+</sup> stem cells are maintained by the canonical Notch signaling pathway. Our result is consistent with the finding that Notch signaling is essential for the long-term maintenance of neural stem cells in the adult brain hippocampus, where it has been shown that RBP-J is recruited to the *Sox2* promoter and activates its expression (Ehm et al., 2010). In



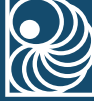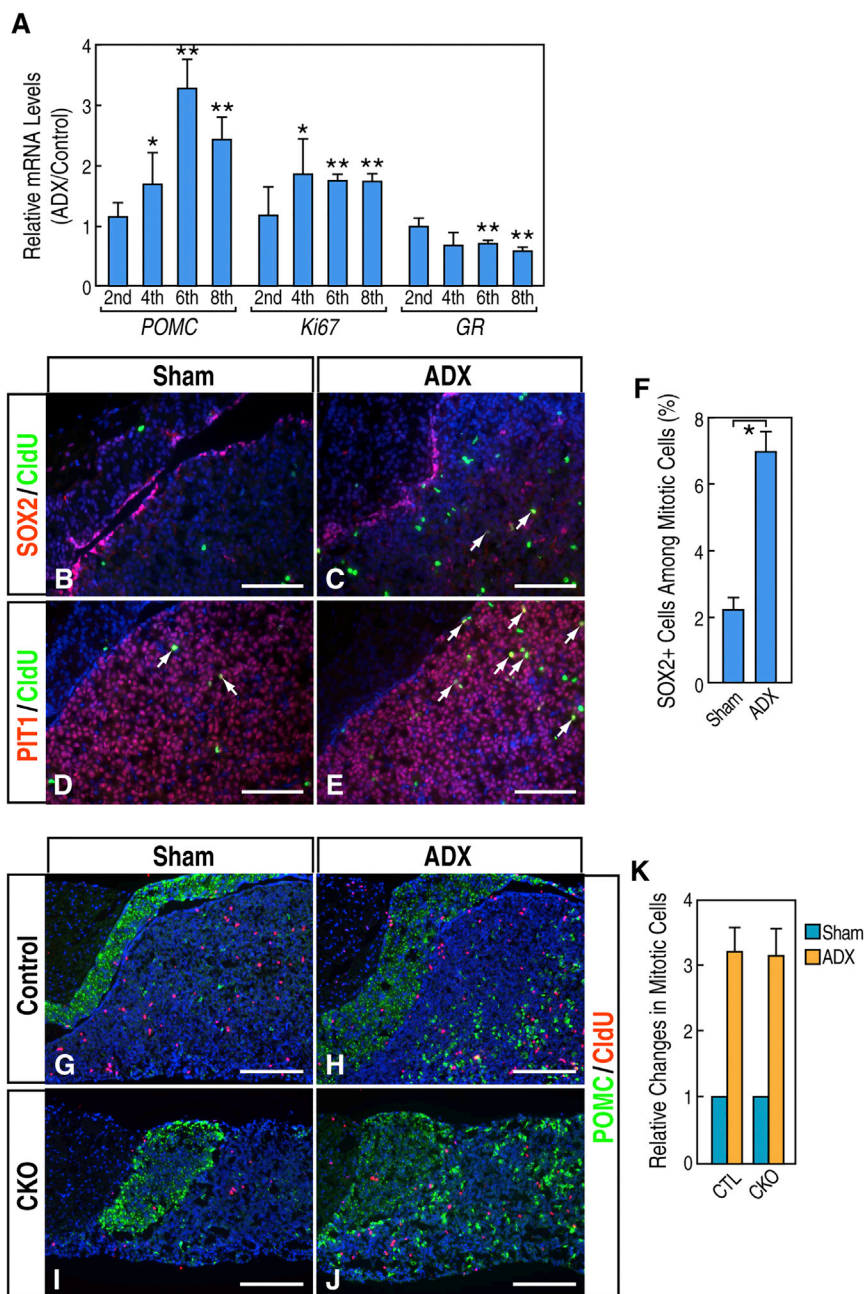

**Figure 7. SOX2<sup>+</sup> Cells Are Mobilized upon Target Organ Ablation but Contribute a Small Percentage of Overall Pituitary Gland Activation**

(A) qRT-PCR of *Pomc*, *Ki67*, and glucocorticoid receptor (*GR*) in the pituitary glands after bilateral ADX in wild-type control mice. Data are represented as mean  $\pm$  SEM (n = 3 mice, \*p < 0.05, \*\*p < 0.01).

(B–E) Double immunofluorescence labeling of SOX2/CldU (B and C) and PIT1/CldU (D and E) in sham- (B and D) and ADX-operated (C and E) wild-type pituitary glands. The arrows indicate co-labeling.

(F) Quantification of SOX2<sup>+</sup> cells among mitotic cells in sham- and ADX-operated wild-type pituitary glands. Data are represented as mean  $\pm$  SEM (n = 3 mice, \*p < 0.05).

(G–J) Double immunofluorescence labeling of POMC/CldU in sham- (G) and ADX-operated (H) control animals and *Rbp-J<sup>f/f</sup>*, *Prop1-Cre* mutants (CKO, I and J).

(K) Quantification of relative changes in mitotic cells in response to ADX in wild-type control and *Rbp-J<sup>f/f</sup>*, *Prop1-Cre* mutants. Data are represented as mean  $\pm$  SEM (n = 3 mice).

Scale bars, 100  $\mu$ m (B–E) and 200  $\mu$ m (G–J).

the absence of Notch signaling, the pituitary stem cells were depleted gradually in the postnatal pituitary gland. This was accomplished by employing *Prop1-Cre*, which is expressed in all RP progenitors, but not so early to interfere with the lineage commitment program, in which Notch signaling plays a pivotal role (Zhu et al., 2006). In addition, there was a reduction in the number of SOX2<sup>+</sup> cells in mutant mice in which *Rbp-J* was specifically deleted in SOX2<sup>+</sup> cells. Consistent with these data, chemical inhibition of Notch activation in primary culture resulted in a

decreased number of pituitary spheres. Taken together, these results reveal that Notch signaling controls the fate choices of RP progenitors in a narrow developmental window, whereas it is required continuously for the maintenance of SOX2<sup>+</sup> pituitary stem cells.

During embryonic pituitary organogenesis, SOX2<sup>+</sup> cells exhibit a remarkable capacity for proliferation (Figure S1L; Davis et al., 2011), whereas, after birth, these cells remain mitotically active for the initial 3 weeks and then become mostly quiescent after this period. For the first 3 days after



birth, they are the dominant cell type undergoing cell division, and their postnatal proliferation makes a significant contribution to pituitary gland expansion. We show that postnatal pituitary expansion can be attributed to successive and overlapping waves of proliferation of SOX2<sup>+</sup> stem cells and committed/differentiated cells, as exemplified by PIT1<sup>+</sup> cells. How the mitotic properties of SOX2<sup>+</sup> stem cells are regulated dynamically during embryonic development, postnatal growth, and subsequent homeostasis remains to be fully elucidated.

In the absence of SOX2<sup>+</sup> stem cells and Notch signaling in *Rbp-J<sup>fl/fl</sup>*, *Prop1-Cre* mutant mice, the pituitary glands are hypoplastic and dysmorphic. Interestingly, re-entry of PIT1<sup>+</sup> lineages into the cell cycle after birth is delayed in the mutant. Consistent with our finding, reduced postnatal pituitary proliferation has been observed in *Notch2<sup>fl/fl</sup>*, *Foxg1-Cre* mice with limited loss of SOX2<sup>+</sup> stem cells and partial loss of Notch signaling (Nantie et al., 2014). We have shown previously that ablating Notch signaling in PIT1<sup>+</sup> cells by expressing a dominant-negative form of RBP-J did not result in any detectable phenotype, suggesting that Notch signaling is not required in lineage-committed cells (Zhu et al., 2006). Taken together, these results imply an additional role of Notch signaling during late pituitary development in regulating cell maturation and setting up the gland for postnatal expansion. Interestingly, it has been demonstrated recently that ectopic expression of the activated form of  $\beta$ -catenin in SOX2<sup>+</sup> stem cells gives rise to pituitary tumors in a non-cell-autonomous manner (Andoniadou et al., 2013), consistent with the idea that SOX2<sup>+</sup> cells can function as a signaling center under specific conditions to have a profound effect in the pituitary gland. It is tempting to speculate that SOX2<sup>+</sup> stem cells may additionally contribute to postnatal pituitary expansion by providing a paracrine signal for regulating the proper timing of PIT1<sup>+</sup> cell re-entry into the cell cycle.

Tissue homeostasis in the adult stage is maintained by different mechanisms. In fast turnover tissues, e.g., the intestine and epidermis, tissue maintenance is coordinated by tissue-specific stem cells through self-renewal and differentiation processes, whereas initial analysis in slow turnover tissue, e.g., the pancreas, tissue homeostasis can be largely mediated by replication of differentiated cells (Brennan and Melton, 2009; Simons and Clevers, 2011). Our data reveal that SOX2<sup>+</sup> stem cells and PIT1<sup>+</sup> differentiated cells become essentially quiescent a few weeks after birth and that they divide slowly in the adult pituitary gland. Our findings suggest that, after an initial postnatal expansion period, the adult pituitary gland is maintained by stochastic cellular self-replication rather than stem cell replenishment. Consistent with this notion, genetic lineage tracing of SOX2<sup>+</sup> cells in the young adult pituitary

gland has shown that SOX2<sup>+</sup> labeled cells rarely differentiate into different pituitary lineages and mostly remain as SOX2<sup>+</sup> stem cells (Andoniadou et al., 2013; Rizzoti et al., 2013). In addition, we showed that, during pregnancy and lactation, SOX2<sup>+</sup> cells are not mobilized readily and not essential for these processes. However, we found that SOX2<sup>+</sup> cell can be re-activated following bilateral adrenalectomy when the negative feedback inhibition is eliminated, although they represent only a minor proportion of cells that were mobilized for proliferation, consistent with recent findings (Langlais et al., 2013; Rizzoti et al., 2013). Indeed, ADX responses were not affected significantly in the absence of SOX2<sup>+</sup> cells, suggesting that, although SOX2<sup>+</sup> cells can be mobilized and make a limited contribution to corticotrope expansion (Rizzoti et al., 2013), they are not an essential component for the functions of a mature gland under the conditions we examined. Interestingly, we observed that PIT1<sup>+</sup> cells are also mobilized to proliferate under pregnancy/lactation, target organ ablation, and partial hypophysectomy (unpublished data) and that they constitute a rather large proportion of proliferating cells. These findings raise the intriguing possibility that PIT1<sup>+</sup> cells, and potentially other cell types, may function as reserve cells and contribute to pituitary plasticity in response to physiological demands. Indeed, it has been demonstrated recently that differentiated cells of the stomach and lung can function as stem cells and give rise to various cell types of the tissues, revealing enormous plasticity of cells (Stange et al., 2013; Tata et al., 2013). Whether and how PIT1<sup>+</sup> cells and other cells in the pituitary gland respond to physiological demands and whether transdifferentiation is involved are interesting questions to be investigated.

## EXPERIMENTAL PROCEDURES

### Mice

*Prop1-Cre* transgenic mice were generated by using the 2.2-kb promoter and enhancer region of the *Prop1* gene to drive CRE recombinase expression. *Rbp-J<sup>fl/fl</sup>* mice were provided by Dr. T. Honjo (Tanigaki et al., 2002). *Sox2-Cre<sup>ERT2</sup>* (Arnold et al., 2011), *Rosa26-LacZ* reporter *Gt(ROSA)26Sor<sup>tm1Sor</sup>* (Soriano, 1999), *Z/EG* (Tg(CAG-Bgeo/GFP)) (Novak et al., 2000), and *Rosa26-EYFP* (Srinivas et al., 2001) mice were obtained from Jackson Laboratory. Noon of the day of the vaginal plug was considered E0.5. For lineage-tracing experiments, tamoxifen was injected at P1 and P2 at 0.075  $\mu$ g/g. Care and experimentation were carried out in accordance with the Institutional Animal Care and Use Committee of University of California at San Diego.

### CldU/IdU Labeling

For CldU and IdU labeling, the animals received one intraperitoneal injection of CldU for 1 day at noon, followed by a similar injection of IdU for 1 day (at 100  $\mu$ g/g body weight), and were





sacrificed 1 day after the last injection. For the postnatal labeling index experiment, the animals were injected with IdU at noon and sacrificed 2 hr later. CldU and IdU were obtained from Sigma.

### Cell Counting and Statistical Analysis

At least 2,000 DAPI<sup>+</sup> cells from the anterior lobe and periluminal region from at least four comparable fields of different sections were counted manually per sample. Results are presented as mean ± SEM. Two-tailed Student's t test was used to compare the difference between two sets of values.  $p \leq 0.05$  was considered to indicate statistical significance (\* $p \leq 0.05$ , \*\* $p \leq 0.01$ ).

### SUPPLEMENTAL INFORMATION

Supplemental Information includes Supplemental Experimental Procedures, seven figures, and one table and can be found with this article online at <http://dx.doi.org/10.1016/j.stemcr.2015.11.001>.

### ACKNOWLEDGMENTS

We would like to thank Drs. K. Scully, D. Skowronska-Krawczyk, and C. Lin in the M.G.R. laboratory and Dr. Hoi U for discussions and suggestions and J. Hightower for figure preparation. We thank Dr. N. Justice for ADX surgery training. X.Z. was partially supported by NICHD R03HD060779. M.G.R. is an investigator with the Howard Hughes Medical Institute. This research was supported by a grant from the NIDDK (to M.G.R.).

Received: April 30, 2014

Revised: November 2, 2015

Accepted: November 2, 2015

Published: December 8, 2015

### REFERENCES

Andoniadou, C.L., Matsushima, D., Mousavy Gharavy, S.N., Signore, M., Mackintosh, A.I., Schaeffer, M., Gaston-Massuet, C., Mollard, P., Jacques, T.S., Le Tissier, P., et al. (2013). Sox2(+) stem/progenitor cells in the adult mouse pituitary support organ homeostasis and have tumor-inducing potential. *Cell Stem Cell* *13*, 433–445.

Arnold, K., Sarkar, A., Yram, M.A., Polo, J.M., Bronson, R., Sen Gupta, S., Seandel, M., Geijsen, N., and Hochedlinger, K. (2011). Sox2(+) adult stem and progenitor cells are important for tissue regeneration and survival of mice. *Cell Stem Cell* *9*, 317–329.

Brennan, K., and Melton, D. (2009). Slow and steady is the key to beta-cell replication. *J. Cell. Mol. Med.* *13*, 472–487.

Carbajo-Pérez, E., and Watanabe, Y.G. (1990). Cellular proliferation in the anterior pituitary of the rat during the postnatal period. *Cell Tissue Res.* *261*, 333–338.

Castrique, E., Fernandez-Fuente, M., Le Tissier, P., Herman, A., and Levy, A. (2010). Use of a prolactin-Cre/ROSA-YFP transgenic mouse provides no evidence for lactotroph transdifferentiation after weaning, or increase in lactotroph/somatotroph proportion in lactation. *J. Endocrinol.* *205*, 49–60.

Chen, J., Crabbe, A., Van Duppen, V., and Vankelecom, H. (2006). The notch signaling system is present in the postnatal pituitary: marked expression and regulatory activity in the newly discovered side population. *Mol. Endocrinol.* *20*, 3293–3307.

Chen, J., Gremeaux, L., Fu, Q., Liekens, D., Van Laere, S., and Vankelecom, H. (2009). Pituitary progenitor cells tracked down by side population dissection. *Stem Cells* *27*, 1182–1195.

Davis, S.W., Mortensen, A.H., and Camper, S.A. (2011). Birthdating studies reshape models for pituitary gland cell specification. *Dev. Biol.* *352*, 215–227.

Ehm, O., Göritz, C., Covic, M., Schäffner, I., Schwarz, T.J., Karaca, E., Kempkes, B., Kremmer, E., Pfrieder, F.W., Espinosa, L., et al. (2010). RBPJ-dependent signaling is essential for long-term maintenance of neural stem cells in the adult hippocampus. *J. Neurosci.* *30*, 13794–13807.

Fauquier, T., Rizzoti, K., Dattani, M., Lovell-Badge, R., and Robinson, I.C. (2008). SOX2-expressing progenitor cells generate all of the major cell types in the adult mouse pituitary gland. *Proc. Natl. Acad. Sci. USA* *105*, 2907–2912.

Florio, T. (2011). Adult pituitary stem cells: from pituitary plasticity to adenoma development. *Neuroendocrinology* *94*, 265–277.

Fu, Q., and Vankelecom, H. (2012). Regenerative capacity of the adult pituitary: multiple mechanisms of lactotrope restoration after transgenic ablation. *Stem Cells Dev.* *21*, 3245–3257.

Fu, Q., Gremeaux, L., Luque, R.M., Liekens, D., Chen, J., Buch, T., Waisman, A., Kineman, R., and Vankelecom, H. (2012). The adult pituitary shows stem/progenitor cell activation in response to injury and is capable of regeneration. *Endocrinology* *153*, 3224–3235.

Garcia-Lavandeira, M., Quereda, V., Flores, I., Saez, C., Diaz-Rodriguez, E., Japon, M.A., Ryan, A.K., Blasco, M.A., Dieguez, C., Malumbres, M., and Alvarez, C.V. (2009). A GRFα2/Prop1/stem (GPS) cell niche in the pituitary. *PLoS ONE* *4*, e4815.

Gleiberman, A.S., Michurina, T., Encinas, J.M., Roig, J.L., Krasnov, P., Balordi, F., Fishell, G., Rosenfeld, M.G., and Enikolopov, G. (2008). Genetic approaches identify adult pituitary stem cells. *Proc. Natl. Acad. Sci. USA* *105*, 6332–6337.

Gremeaux, L., Fu, Q., Chen, J., and Vankelecom, H. (2012). Activated phenotype of the pituitary stem/progenitor cell compartment during the early-postnatal maturation phase of the gland. *Stem Cells Dev.* *21*, 801–813.

Jayakody, S.A., Andoniadou, C.L., Gaston-Massuet, C., Signore, M., Cariboni, A., Bouloux, P.M., Le Tissier, P., Pevny, L.H., Dattani, M.T., and Martinez-Barbera, J.P. (2012). SOX2 regulates the hypothalamic-pituitary axis at multiple levels. *J. Clin. Invest.* *122*, 3635–3646.

Kelberman, D., Rizzoti, K., Lovell-Badge, R., Robinson, I.C., and Dattani, M.T. (2009). Genetic regulation of pituitary gland development in human and mouse. *Endocr. Rev.* *30*, 790–829.

Kita, A., Imayoshi, I., Hojo, M., Kitagawa, M., Kokubu, H., Ohsawa, R., Ohtsuka, T., Kageyama, R., and Hashimoto, N. (2007). Hes1 and Hes5 control the progenitor pool, intermediate lobe specification, and posterior lobe formation in the pituitary development. *Mol. Endocrinol.* *21*, 1458–1466.



- Langlais, D., Couture, C., Kmita, M., and Drouin, J. (2013). Adult pituitary cell maintenance: lineage-specific contribution of self-duplication. *Mol. Endocrinol.* *27*, 1103–1112.
- Levy, A. (2002). Physiological implications of pituitary trophic activity. *J. Endocrinol.* *174*, 147–155.
- Nantie, L.B., Himes, A.D., Getz, D.R., and Raetzman, L.T. (2014). Notch signaling in postnatal pituitary expansion: proliferation, progenitors, and cell specification. *Mol. Endocrinol.* *28*, 731–744.
- Nolan, L.A., and Levy, A. (2006). A population of non-luteinising hormone/non-adrenocorticotrophic hormone-positive cells in the male rat anterior pituitary responds mitotically to both gonadectomy and adrenalectomy. *J. Neuroendocrinol.* *18*, 655–661.
- Novak, A., Guo, C., Yang, W., Nagy, A., and Lobe, C.G. (2000). Z/EG, a double reporter mouse line that expresses enhanced green fluorescent protein upon Cre-mediated excision. *Genesis* *28*, 147–155.
- Olson, L.E., Tollkuhn, J., Scafoglio, C., Krones, A., Zhang, J., Ohgi, K.A., Wu, W., Taketo, M.M., Kemler, R., Grosschedl, R., et al. (2006). Homeodomain-mediated beta-catenin-dependent switching events dictate cell-lineage determination. *Cell* *125*, 593–605.
- Raetzman, L.T., Ross, S.A., Cook, S., Dunwoodie, S.L., Camper, S.A., and Thomas, P.Q. (2004). Developmental regulation of Notch signaling genes in the embryonic pituitary: Prop1 deficiency affects Notch2 expression. *Dev. Biol.* *265*, 329–340.
- Raetzman, L.T., Cai, J.X., and Camper, S.A. (2007). Hes1 is required for pituitary growth and melanotrope specification. *Dev. Biol.* *304*, 455–466.
- Rizzoti, K. (2010). Adult pituitary progenitors/stem cells: from in vitro characterization to in vivo function. *Eur. J. Neurosci.* *32*, 2053–2062.
- Rizzoti, K., Akiyama, H., and Lovell-Badge, R. (2013). Mobilized adult pituitary stem cells contribute to endocrine regeneration in response to physiological demand. *Cell Stem Cell* *13*, 419–432.
- Simons, B.D., and Clevers, H. (2011). Strategies for homeostatic stem cell self-renewal in adult tissues. *Cell* *145*, 851–862.
- Soriano, P. (1999). Generalized lacZ expression with the ROSA26 Cre reporter strain. *Nat. Genet.* *21*, 70–71.
- Srinivas, S., Watanabe, T., Lin, C.S., Williams, C.M., Tanabe, Y., Jessell, T.M., and Costantini, F. (2001). Cre reporter strains produced by targeted insertion of EYFP and ECFP into the ROSA26 locus. *BMC Dev. Biol.* *1*, 4.
- Stange, D.E., Koo, B.K., Huch, M., Sibbel, G., Basak, O., Lyubimova, A., Kujala, P., Bartfeld, S., Koster, J., Geahlen, J.H., et al. (2013). Differentiated Troy+ chief cells act as reserve stem cells to generate all lineages of the stomach epithelium. *Cell* *155*, 357–368.
- Tando, Y., Fujiwara, K., Yashiro, T., and Kikuchi, M. (2013). Localization of Notch signaling molecules and their effect on cellular proliferation in adult rat pituitary. *Cell Tissue Res.* *351*, 511–519.
- Tanigaki, K., Han, H., Yamamoto, N., Tashiro, K., Ikegawa, M., Kuroda, K., Suzuki, A., Nakano, T., and Honjo, T. (2002). Notch-RBP-J signaling is involved in cell fate determination of marginal zone B cells. *Nat. Immunol.* *3*, 443–450.
- Taniguchi, Y., Kominami, R., Yasutaka, S., and Kawarai, Y. (2000). Proliferation and differentiation of pituitary corticotrophs during the fetal and postnatal period: a quantitative immunocytochemical study. *Anat. Embryol. (Berl.)* *201*, 229–234.
- Taniguchi, Y., Yasutaka, S., Kominami, R., and Shinohara, H. (2001a). Proliferation and differentiation of pituitary somatotrophs and mammatrophs during late fetal and postnatal periods. *Anat. Embryol. (Berl.)* *204*, 469–475.
- Taniguchi, Y., Yasutaka, S., Kominami, R., and Shinohara, H. (2001b). Proliferation and differentiation of thyrotrophs in the pars distalis of the rat pituitary gland during the fetal and postnatal period. *Anat. Embryol. (Berl.)* *203*, 249–253.
- Taniguchi, Y., Yasutaka, S., Kominami, R., and Shinohara, H. (2002). Proliferation and differentiation of rat anterior pituitary cells. *Anat. Embryol. (Berl.)* *206*, 1–11.
- Tata, P.R., Mou, H., Pardo-Saganta, A., Zhao, R., Prabhu, M., Law, B.M., Vinarsky, V., Cho, J.L., Breton, S., Sahay, A., et al. (2013). Dedifferentiation of committed epithelial cells into stem cells in vivo. *Nature* *503*, 218–223.
- Vankelecom, H., and Chen, J. (2014). Pituitary stem cells: where do we stand? *Mol. Cell. Endocrinol.* *385*, 2–17.
- Vankelecom, H., and Gremeaux, L. (2010). Stem cells in the pituitary gland: A burgeoning field. *Gen. Comp. Endocrinol.* *166*, 478–488.
- Ward, R.D., Davis, S.W., Cho, M., Esposito, C., Lyons, R.H., Cheng, J.F., Rubin, E.M., Rhodes, S.J., Raetzman, L.T., Smith, T.P., and Camper, S.A. (2007). Comparative genomics reveals functional transcriptional control sequences in the Prop1 gene. *Mamm. Genome* *18*, 521–537.
- Zhu, X., Zhang, J., Tollkuhn, J., Ohsawa, R., Bresnick, E.H., Guillemot, F., Kageyama, R., and Rosenfeld, M.G. (2006). Sustained Notch signaling in progenitors is required for sequential emergence of distinct cell lineages during organogenesis. *Genes Dev.* *20*, 2739–2753.
- Zhu, X., Gleiberman, A.S., and Rosenfeld, M.G. (2007). Molecular physiology of pituitary development: signaling and transcriptional networks. *Physiol. Rev.* *87*, 933–963.



Stem Cell Reports, Volume 5

Supplemental Information

**Notch-Dependent Pituitary SOX2<sup>+</sup> Stem Cells Exhibit a  
Timed Functional Extinction in Regulation of the Postnatal  
Gland**

Xiaoyan Zhu, Jessica Tollkuhn, Havilah Taylor, and Michael G. Rosenfeld

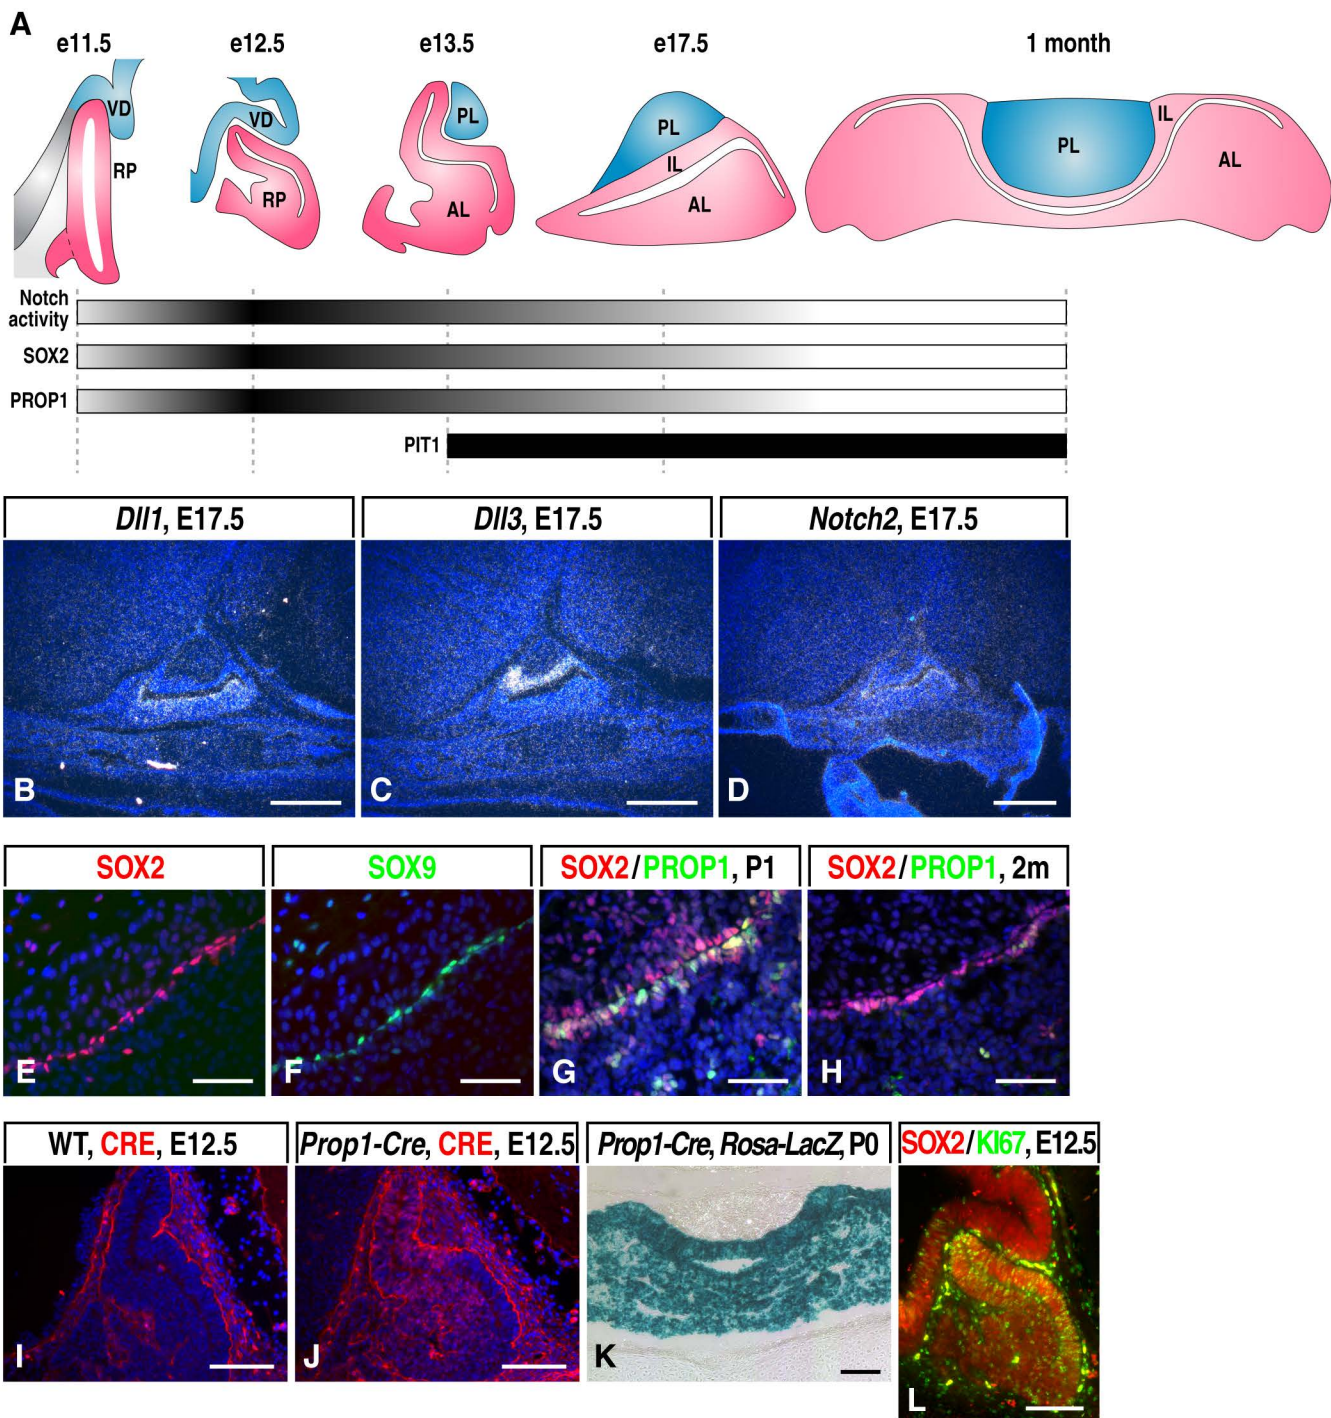



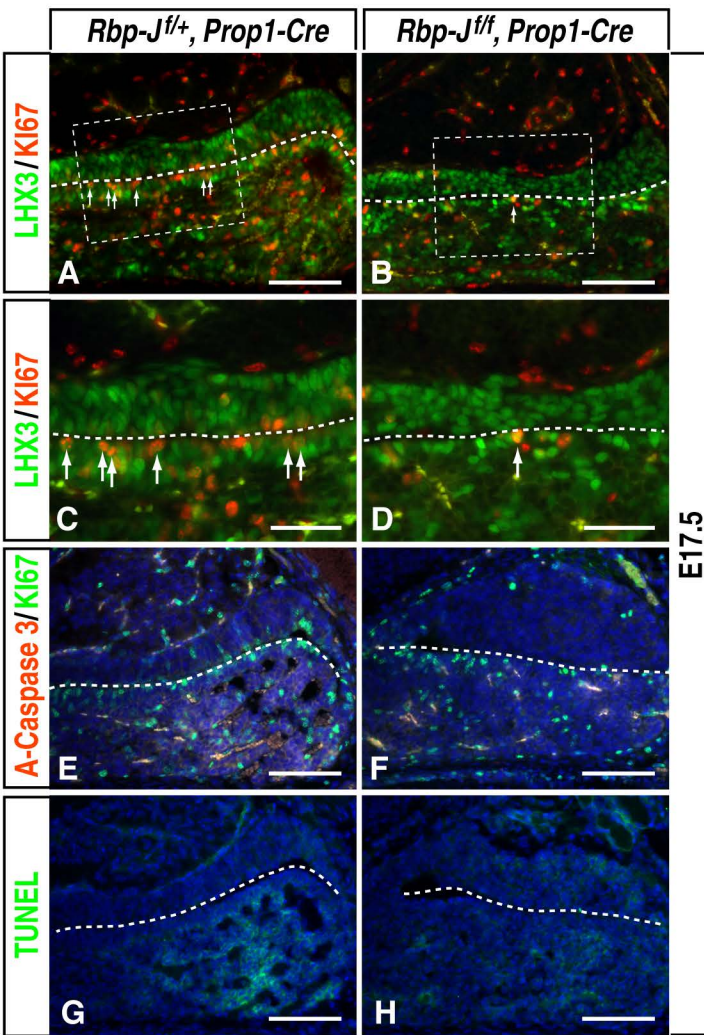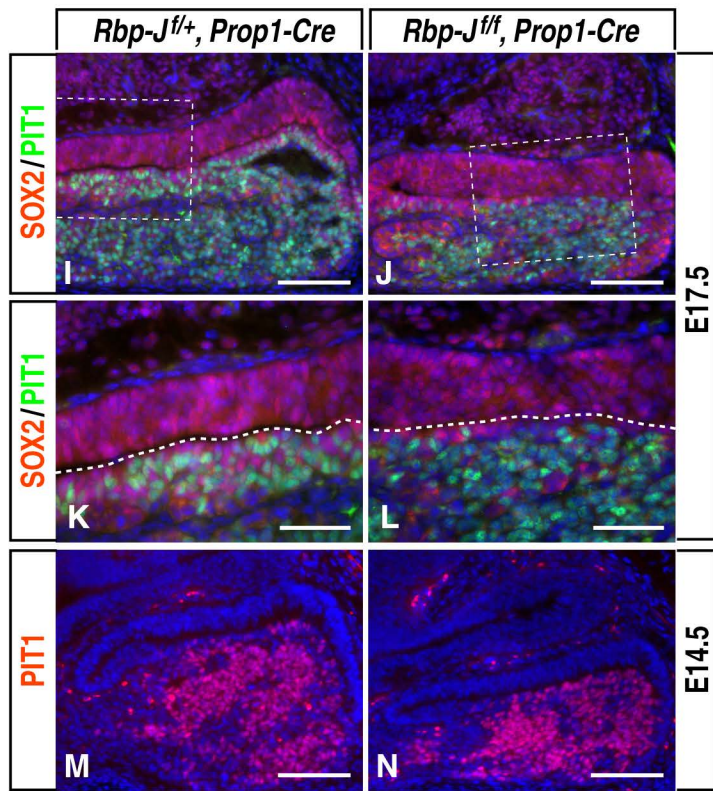

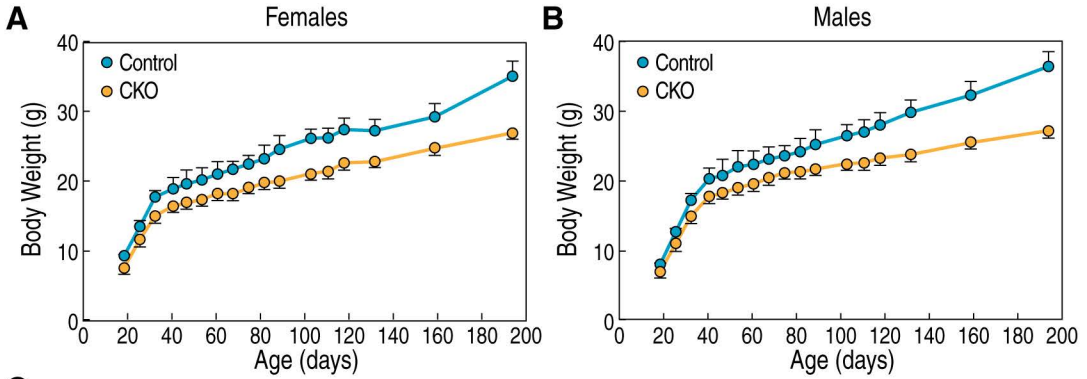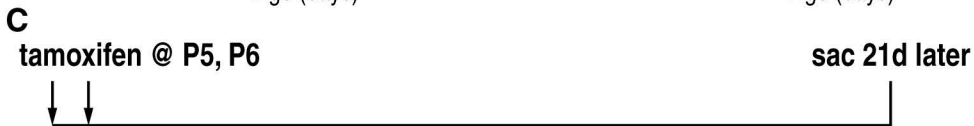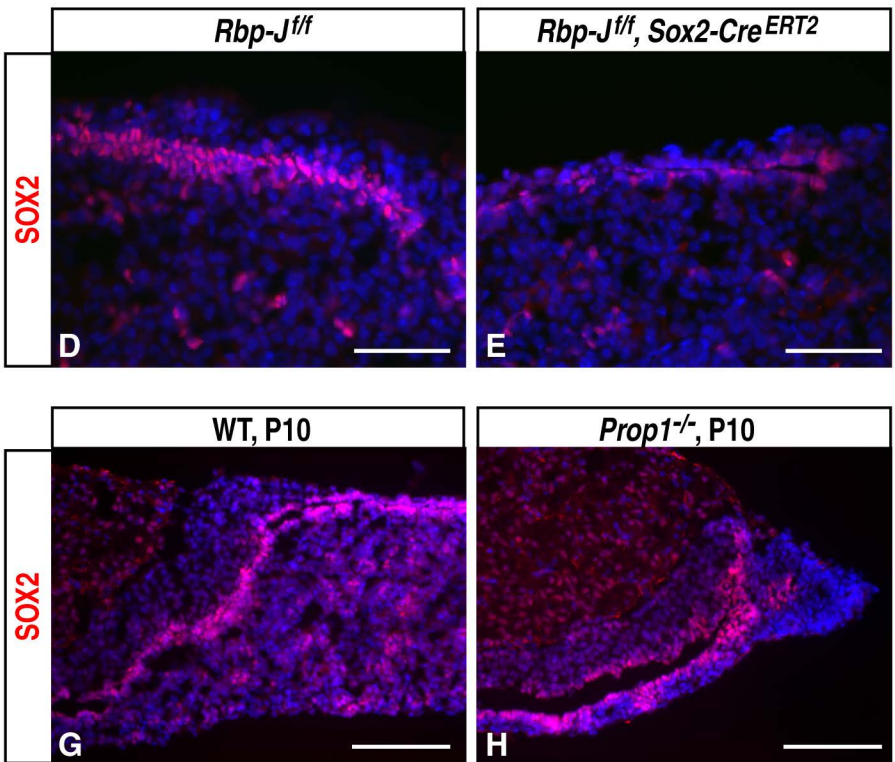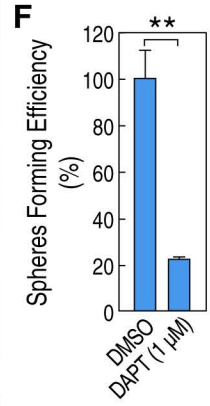

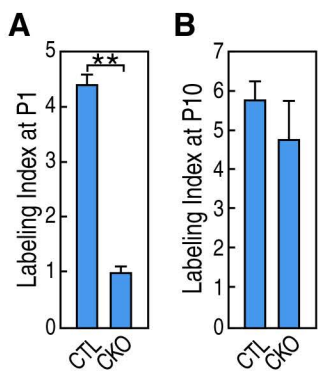



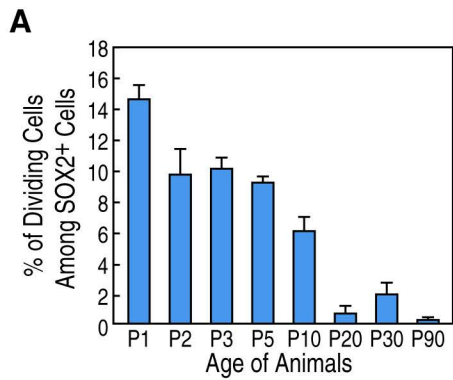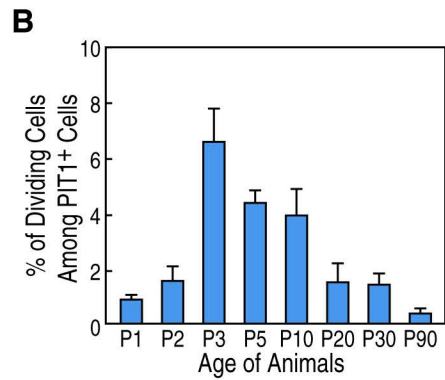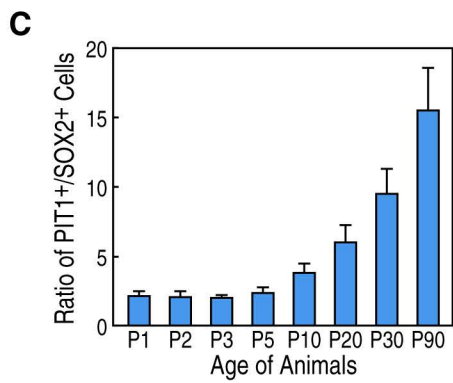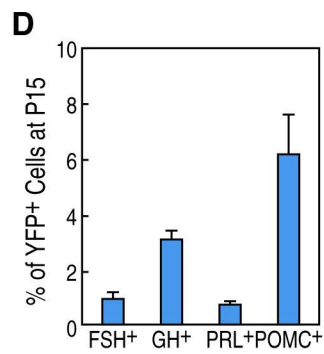

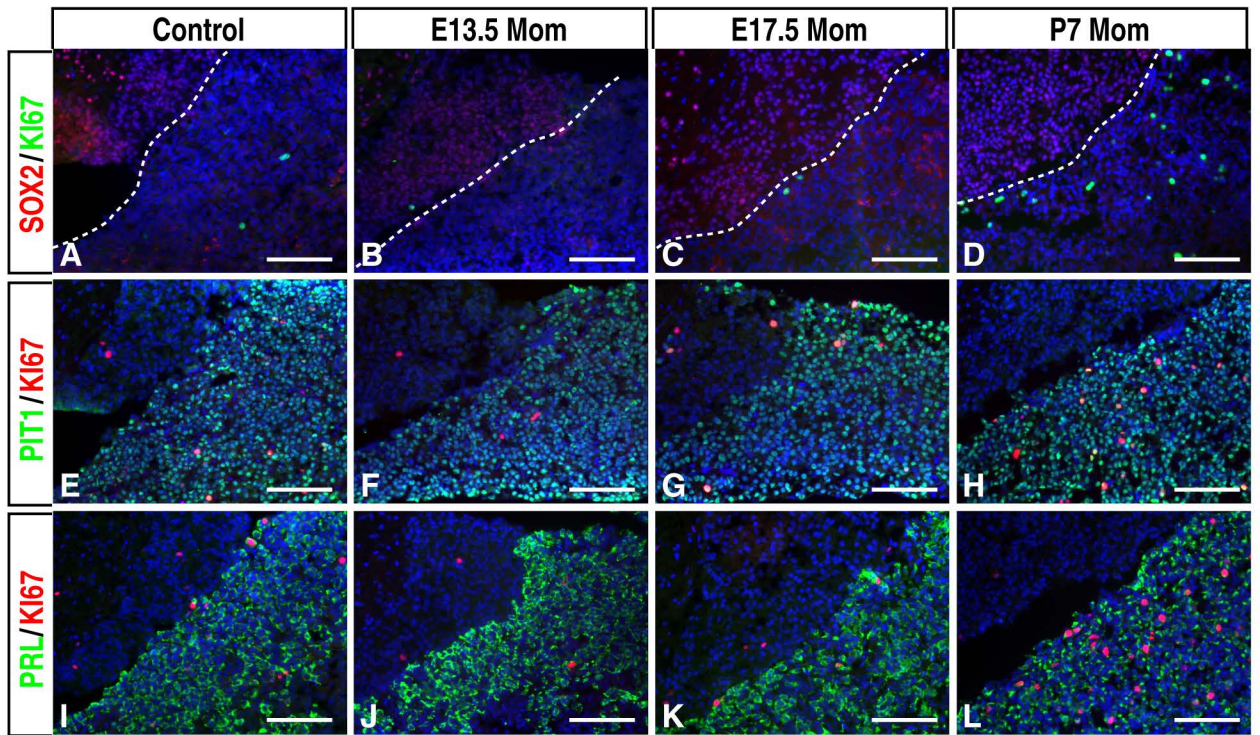

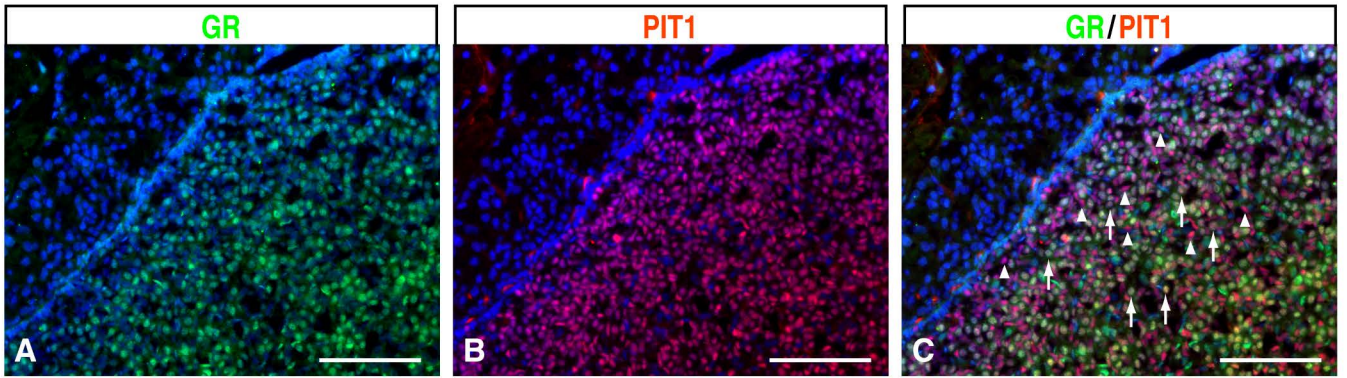



## Supplemental Figure Legends:

### Figure S1. Characterization of pituitary stem cells and *Prop1-Cre*, Related to Figure 1.

(A) Ontogeny of Notch signaling, SOX2, PROP1, and PIT1 during pituitary organogenesis. VD: ventral diencephalon; RP: Rathke's pouch; AL: anterior lobe; IL: intermediate lobe; PL: posterior lobe. (B-D) *in situ* hybridization of *Dll1*, *Dll3* and *Notch2* in pituitary gland at E17.5. (E-F) Immunofluorescence labeling of SOX2 (E) and SOX9 (F) in 2-month-old pituitary gland. (G-H) Double immunofluorescence labeling of SOX2 and PROP1 in pituitary gland at P1 (G) and 2 months (H). (I-J) Immunofluorescence labeling of CRE in control and *Prop1-Cre* RP at E12.5. (K) LacZ reporter analysis of the *Prop1-Cre*, *Rosa-LacZ* at P0. (L) Double immunofluorescence labeling of SOX2 and KI67 in E12.5 embryonic RP. Scale bars: B-D, 400  $\mu\text{m}$ ; E-H, 50  $\mu\text{m}$ ; I-L, 100  $\mu\text{m}$ .

### Figure S2. Characterization of embryonic pituitary gland in wild-type controls and *Rbp-J<sup>ff</sup>*, *Prop1-Cre* mutants, Related to Figure 2.

(A-D) Double immunofluorescence labeling of LHX3/KI67 at E17.5 showed that LHX3 is expressed in the intermediate lobe and periluminal region in the anterior lobe, and there are reduced number of LHX3<sup>+</sup>KI67<sup>+</sup> cells in the mutant gland at periluminal region. Arrows indicate representative double-positive cells. (E-F) Double immunofluorescence labeling of activated Caspase 3 and KI67 at E17.5. (G-H) TUNEL assay at E17.5. (I-L) Double immunofluorescence labeling of SOX2/PIT1 showed expression of SOX2 and PIT1 is mutually exclusive and there are reduced periluminal SOX2<sup>+</sup> cells in the mutant anterior gland at E17.5. (M-N) Immunofluorescence staining of PIT1 at E14.5 showed that differentiation of PIT1<sup>+</sup> cells is not

affected in the mutant gland. Dashed line: lumen between intermediate and anterior lobes. Dashed area in A, B, I, and J (200 x) are presented in C, D, K, and L (400 x) respectively. Scale bars: A, B, E-H, I, J, M, N, 100  $\mu\text{m}$ ; C, D, K, L, 50  $\mu\text{m}$ .

**Figure S3. Notch signaling is required in SOX2<sup>+</sup> cells and SOX2 acts upstream of PROP1, Related to Figure 3.**

(A, B) Growth curves of wild-type controls and *Rbp-J<sup>ff</sup>*, *Prop1-Cre* mutants showed reduced body weights of mutants in both females and males in comparison to the wild-type controls. Data are represented as mean  $\pm$  SEM, n = 3 mice. C. Scheme of inactivating Notch signaling by tamoxifen induction in *Rbp-J<sup>ff</sup>*, *Sox2-Cre<sup>ERT2</sup>* mice. (D, E) Immunofluorescence labeling of SOX2 in control and *Rbp-J<sup>ff</sup>*, *Sox2-Cre<sup>ERT2</sup>*. (F) Quantification of pituitary spheres cultured from 3-month-old wild-type pituitary gland in the presence of DMSO or DAPT (1 $\mu\text{M}$ ). Data are represented as mean  $\pm$  SEM, n = 3 mice, \*\* p < 0.01. (G, H) Immunofluorescence labeling of SOX2 in control and *Prop1<sup>-/-</sup>* pituitary gland at P10. Scale bars: D, E, 50  $\mu\text{m}$ ; G, H, 100  $\mu\text{m}$ .

**Figure S4. Labeling index of wild-type control and *Rbp-J<sup>ff</sup>*, *Prop1-Cre* mutant at P1 and P10, Related to Figure 4.** Data are represented as mean  $\pm$  SEM, n = 3 mice, \*\* p < 0.01.

**Figure S5. Characterization of cell division of in wild-type pituitary glands at different postnatal stages and postnatal fate-mapping of SOX2<sup>+</sup> cells, Related to Figure 5.**

(A-B) Quantification of actively dividing cells among SOX2<sup>+</sup> cells and PIT1<sup>+</sup> in the anterior lobe of wild-type pituitary gland. (C) Relative ratio of the numbers of PIT1<sup>+</sup> cells to SOX2<sup>+</sup> cells in the anterior lobe. (D) Percentage of distinct cells types among YFP<sup>+</sup> cells at P15 after fate mapping of SOX2<sup>+</sup> cells in *Sox2-Cre<sup>ERT2</sup>*; *ROSA26-EYFP* mice. Data are represented as mean  $\pm$  SEM, n = 3 mice.

**Figure S6. Characterization of proliferating cells in 3-month-old *Rbp-J<sup>ff</sup>*, *Prop1-Cre* mice during pregnancy and lactation, Related to Figure 6.**

(A-L) Double immunofluorescence labeling of SOX2/KI67 (A-D), PIT1/KI67 (E-H) and PRL/KI67 (I-L) at different stages of pregnancy and lactation. Dashed line: lumen between intermediate and anterior lobes. Scale bar: 100  $\mu\text{m}$ .

**Figure S7. GR is expressed in PIT1<sup>+</sup> cells, Related to Figure 7.**

Expression of GR (A), PIT1 (B) and GR/PIT1 (C) in the wild-type anterior pituitary gland. Arrows and arrowheads indicate representative PIT1<sup>+</sup>GR<sup>+</sup> and PIT1<sup>+</sup> cells, respectively. Scale bar: 100  $\mu\text{m}$ .



**Table 1: Primer Sequences Used in RT-QPCR**

| <b>Primer name</b> | <b>Sequence (5'→3')</b>    |
|--------------------|----------------------------|
| Rbp-J-F            | TGCATTGCTTCAGGAACGAAGGTG   |
| Rbp-J-R            | TGACAGTCTGCCCGTAATGGATGT   |
| Sox2-F             | TGCAGTACAACCTCCATGACCAGCTC |
| Sox2-R             | TGGAGTGGGAGGAAGAGGTAACCA   |
| E-Cadherin-F       | AACAACCTGCATGAAGGCGGGAATC  |
| E-Cadherin-R       | CCTGTGCAGCTGGCTCAAATCAAA   |
| Hey1-F             | TTCCTTCAGCTCCTTCCACCTACT   |
| Hey1-R             | CCGGGAGCTATCTTTCTTAAGTG    |
| Hes1-F             | CTATCATGGAGAAGAGGCGAAG     |
| Hes1-R             | CCGGGAGCTATCTTTCTTAAGTG    |
| Prop1-F            | TCAGCCTTTGGGAGGAACCAGTAT   |
| Prop1-R            | TTCTGGCAAGAAGCCAGAGAAGGT   |
| POMC-F             | TAGAGTTCAAGAGGGAGCTGGAAG   |
| POMC-R             | CGCGTTCTTGATGATGGCGTTCTT   |
| Ki67-F             | GCACCAAAGCAGGAAGCAACAGAT   |
| Ki67-R             | ACAGTGCTAACCTGCTCTTCCACA   |
| Gr-F               | ATCATGGTAGCCTTCGGGAGCTTT   |
| Gr-R               | AAGCCAACCCTTTCCTGAAGACCT   |
| Gapdh-F            | TCAACAGCAACTCCCCTCTTCCA    |
| Gapdh-R            | TCTTACTCCTTGGAGGCCATGTA    |

## **Supplemental Experimental Procedures:**

### ***In situ* Hybridization, Immunofluorescence, and TUNEL Assay**

In situ hybridization was carried out as previously described (Zhu et al., 2006). Immunofluorescence (IF) staining was performed as previously described (Zhu et al., 2006) with some modifications. The animals were transcardially perfused with 4% paraformaldehyde in PBS and the pituitary glands were dissected and postfixed for 1 hour, cryoprotected with 30% sucrose, embedded in OCT, and sectioned at 10  $\mu$ m. The primary antibodies used in this study were: rabbit anti-SOX2 (Millipore, AB5603, 1:500; Stemgent, 09-0024, 1:100); goat anti-SOX2 (Neuromics, GT15098, 1:500); E-Cadherin (Zymed, 13-1900, 1:1000); Hes1 (kindly provided by Dr. Nadean Brown, Cincinnati Children's Hospital Medical Center, 1:800); SOX9 (Sigma, HPA001758, 1:100); PROP1 (kindly provided by Dr. Aimee Ryan, McGill University 1:500); EGFP (Invitrogen, A6455, 1:500); KI67 (BD Biosciences, 550609, 1:100); LHX3 (Millipore, AB3202, 1:500); PIT1 (BD transduction laboratory, 610223, mouse, 1:100), PIT1 (in house, 1:100); chicken anti-Nestin (Novus Biologicals, NB100-1604, 1:1000); rat anti-BrdU (GeneTex, clone BU1/75, GTX26326, 1:50); mouse anti-BrdU (BD Biosciences, clone B44, 347580, 1:50); cleaved caspase-3 (Cell Signaling, 9661, 1:100); GR (Abcam, ab3578, 1:200); CRE (Millipore, MAB3120, 1:500); Prolactin (DAKO, A0569, 1:200); POMC (Fitzgerald, 10C-CR1096M2, 1:1000). Other antibodies against pituitary hormones were obtained from the National Hormone & Peptide Program (NHPP), NIDDK and Dr. A. F. Parlow. Alexa conjugated secondary antibodies were from Invitrogen. All images were captured with a Hamamatsu camera. TUNEL assay was performed according to manufacturer's instruction (Roche, Cell death detection kit). All the images were presented in the same orientation as Figure 1A and Figure 1B for embryonic stages and postnatal stages respectively unless otherwise indicated.

### **LacZ Activity Assay**

For the whole mount X-gal staining, mouse embryos were fixed in 4% paraformaldehyde for 30 min on ice, permeabilized in PBS containing 0.02% Na deoxycholate and 0.01% NP-40 and were then subjected to 5-bromo-4-chloro-3-indolyl-D-galactoside (X-gal) (5mM potassium ferrocyanide, 5mM potassium ferricyanide, 2mM MgCl<sub>2</sub>, 0.02% NP-40, 1mg/ml X-gal in PBS) staining at 37°C for overnight. Embryos were dehydrated in an ethanol series, and cleared in a 1:2 mix of benzyl alcohol and benzyl benzoate. For the tissue section X-gal staining, the mouse embryos were fixed in 4% paraformaldehyde for 30 min on ice, cryoprotected with 30% sucrose, and sectioned at 16 μm. The sections were postfixated briefly and then subjected to X-gal staining for overnight.

### **Quantitative RT-PCR**

Total RNA was isolated from dissected pituitary glands using the RNeasy Mini Kit (Qiagen), and cDNA was synthesized using SuperScript III (Invitrogen). Quantitative RT-PCR using Sybr Green was performed on an Mx3000P QPCR System (Stratagene). The primers are listed in Supplemental Table 1.

### **Pituitary Sphere Culture**

Pituitary sphere culture was established as previously described (Fauquier et al., 2008) with some modifications. The anterior lobe of dissected pituitary gland was dissociated in 0.4% Collagenase II and 200 μg/ml DNase I at 37°C for 30 minutes with rotation followed by pipeting into single cells and passing through 40 μm filter. The dissociated cells were then cultured in DMEM/F12 containing 0.5% BSA, B27, N2 supplemented with 20 ng/ml FGF and EGF. DMSO or 1 μM DAPT were added the first day of primary culture. Spheres were counted 6 days later.



### **Bilateral Adrenalectomy**

3-month-old mice were anaesthetized by intraperitoneal injection of Ketamine/Xylazine according to the UCSD guidelines. A small incision was made with dissection scissors on the skin and underneath body wall respectively, and the adrenal gland was completely removed using the forceps. The body wall was then be sewn up using a suture needle and the skin was closed with a wound clip system applicator. Following surgery, the mice were provided with drinking water containing 0.9% sodium chloride. Sex-matched and age-matched animals were used for the surgery. CldU were injected on the third and forth day after surgery and pituitaries were harvested on the fifth day.
